# Supplementary material for: Salinity-Induced Palmella Formation Mechanism in Halotolerant Algae Dunaliella salina Revealed by Quantitative Proteomics and Phosphoproteomics
Source: Front Plant Sci. 2017 May 23;8:810. doi: 10.3389/fpls.2017.00810 (PMC5441111; doi:10.3389/fpls.2017.00810)
Supplement: Supplementary file 3 [file Table3.XLS]

## Sheet: Phosphorylation sites
Supplemental Table S3. Phosphorylation proteins identified in D. salina cells using stable isotope dimethyl label coupled with Ti4+-IMAC enrichment and LC-MS/MS.
Gi Number(a)	Protein Name(b)	Species(c)	UniProtKB/GenBank(d)	Position(e)	Localization Probability(f)	Number of Phospho (STY)(g)	Amino Acid(h)	Sequence Window(i)	Motifs(j)	PEP(k)	Score(l)	Modified Sequence(m)	Position in peptide(n)	Charge(o)	m/z(p)	Mass Error[ppm](q)	Ratio H/L Normalized.Biol.1(r)	Ratio H/L Normalized.Biol.2(s)	Ratio H/L Normalized.Biol.3(t)	[0.66,1.5].Significant change.Biol.1(u)	[0.66,1.5].Significant change.Biol.2(v)	[0.66,1.5].Significant change.Biol.3(w)	Ratio H/L Normalized.AVERAGE(x)	Ratio H/L Normalized.RSD(y)
	Membrane and transport (4)
gi|307105720	Hypothetical protein CHLNCDRAFT_135909, containing cd02180 saccharomyces cerevisiae KRE6 and related glucanses, member of glycosyl hydrolase family 16*	Chlorella variabilis	gb|EFN53968.1	1310	1	1	Y	GEYVRWYIDGHFV		0.0998308	115.6	_WpYIDGHFVYEVNK_	2	3	583.927	-5.7508	Identified
gi|300256216	Hypothetical protein VOLCADRAFT_99753, containing cd03213 ABCG transporters domain*	Volvox carteri f. nagariensis	gb|EFJ40488.1	190	1	1	T	QHTKIGTPFIKVV	FHA2 Rad53p;Proline-directed	0.229233	75.974	_IGpTPFIK_	3	2	428.222	-1.4066			0.72397			→	0.72397
gi|226522388	Formate-nitrite transporter family	Micromonas sp. RCC299	gb|ACO68371.1	91	1	1	T	SRRKCLTVVANVV	FHA KAPP	0.200041	112.28	_CLpTVVANVVPQGDALPPPAVFNAVLATAEK_	3	3	1047.87	-0.36411			Identified
gi|300268328	Component of oligomeric golgi complex 8	Volvox carteri f. nagariensis	gb|EFJ52509.1	206	0.999994	1	S	EALDLQSFISRVG		0.107532	127.87	_NGVYDEALDLQpSFISR_	12	2	953.933	1.9931		Identified
	Cell structure (9)
gi|2625154	Alpha-tubulin	Chloromonas sp. ANT3	gb|AAB86648.1	349	1	1	T	FVDWCPTGFKCGI		5.13158e-73	224.9	_TIQFVDWCPpTGFK_	10	2	839.87	2.8478	0.21105	Identified		↓			0.21105
gi|333691275	Alpha-tubulin protein	Dunaliella salina	gb|AEF79970.1	349	1	1	T	FVDWCPTGFKCGI		1.87822e-160	238.96	_TIQFVDWCPpTGFK_	10	2	839.87	-1.3011			Identified
gi|226524137	Flagellar associated protein	Micromonas sp. RCC299	gb|ACO70118.1	341	1	1	S	TLERSLSVEEKRE	CAMK2;CHK1;CHK1/2;CK2;PKD	0.00424448	136.37	_SLpSVEEK_	3	2	436.194	-0.353765	0.65181		Identified	↓			0.65181
gi|1279362	Striated sfiber-assemblin	Dunaliella bioculata	emb|CAA62413.1	44	1	1	T	KFAGLWTDLEQEK	CK2	5.2591e-08	181	_FAGLWpTDLEQEK_	6	2	758.84	4.264		1.0212			→		1.0212
gi|1279362	Striated sfiber-assemblin	Dunaliella bioculata	emb|CAA62413.1	167	1	1	T	ALDEERTIRMQEQ	PLK1	0.0247748	155.42	_VNECVAALDEERpTIR_	13	2	927.924	2.1478		Identified
gi|1279362	Striated sfiber-assemblin	Dunaliella bioculata	emb|CAA62413.1	21	0.971124	2	S	FSPMRSSVLTTTG	AURORA;AURORA-1;PKA	1.15635e-09	237.17	_SpSVLTpTTGSAIK_	2	2	662.793	4.6317		3.6585			↑		3.6585
gi|1279362	Striated sfiber-assemblin	Dunaliella bioculata	emb|CAA62413.1	24	0.828444	1	T	MRSSVLTTTGSAI	CK1	8.40084e-06	188.29	_SSVLpTTTGSAIK_	5	2	622.81	0.78751	6.7321			↑			6.7321
gi|284518784	Kinesin-like calmodulin binding protein	Dunaliella salina	gb|ADB92502.1	581	1	1	S	DGKAGGSALGLAQ		6.49223e-70	207.39	_AGGpSALGLAQANFGPK_	4	2	769.872	0.88048			0.49793			↓	0.49793
gi|300269070	Hypothetical protein VOLCADRAFT_102859, containing pfam05217 STOP protein*	Volvox carteri f. nagariensis	gb|EFJ53250.1	131	0.999997	1	S	PHERTASMLPRSQ	CAMK2	2.60599	115.19	_TApSMLPR_	3	2	428.193	-2.02			1.3713			→	1.3713
	Carbohydrate and energy metabolism (8)
gi|290465235	Phosphoglucomutase 1 (PGM)	Dunaliella salina	gb|ADD25038.1	163	0.968533	1	S	GIIMSASHNPGGP		9.36616e-15	213.32	_KHYGGIIMSApSHNPGGPEGDFGIK_	11	2	1275.09	1.4236	0.35601			↓			0.35601
gi|208463466	Glucose-6-phosphate isomerase	Dunaliella salina	gb|ACI29026.1	92	0.999978	1	S	RDVESISDTEEWK	CK2	7.91797e-22	226.8	_DVESIpSDTEEWK_	6	2	759.306	2.3255		Identified
gi|168831498	Glyceraldehyde-3-phosphate dehydrogenase	Dunaliella salina	gb|ACA35006.1	74	1	1	S	VVCVNDSGGVKQA		6.36975e-08	215.935	_QDSLLDVVCVNDpSGGVK_	13	2	942.924	1.36245	1.2795	1.2709	1.9736	→	→	↑	1.508	0.267403
gi|168831498	Glyceraldehyde-3-phosphate dehydrogenase	Dunaliella salina	gb|ACA35006.1	322	1	1	S	ADEPLVSADFKGM		0.00867249	233	_NVLAVADEPLVpSADFK_	12	3	589.957	0.42697	1.3896			→			1.3896
gi|168831498	Glyceraldehyde-3-phosphate dehydrogenase	Dunaliella salina	gb|ACA35006.1	166	0.997074	1	S	TAPAKGSDIPTFV		0.00536744	149.07	_VLITAPAKGpSDIPTFVVGVNCDGYK_	10	3	901.115	-0.063305	2.8205	0.78663		↑	→		1.80357	0.7974
gi|307104631	Hypothetical protein CHLNCDRAFT_58753, containing PLN03236 4-alpha-glucanotransferase domain*	Chlorella variabilis	gb|EFN52884.1	518	1	1	T	LCEPWITDEVLQD		0.259515	102.72	_LCEPWIpTDEVLQDVFGVELAPEVAAR_	7	3	1012.82	3.1277	Identified
gi|300259927	Hypothetical protein VOLCADRAFT_65163, containing pfam01238 phosphomannose isomerase type I domain*	Volvox carteri f. nagariensis	gb|EFJ44150.1	98	0.999995	1	S	SVAKALSIQSHPD	CHK1;PKD	0.348947	132.19	_ALpSIQSHPDK_	3	2	588.276	2.0536		0.44476			↓		0.44476
gi|158272830	Predicted protein, containing pfam00933 glycosyl hydrolase family 3 N terminal domain*	Chlamydomonas reinhardtii	gb|EDO98625.1	13	0.999954	1	S	ALGRRASAAAASP	CAMK2;CHK1;CHK1/2;PKA;PKD	0.244942	82.122	_ApSAAAASPALPR_	2	2	581.784	5.9059	Identified
	Photosynthesis (10)
gi|333691283	Chloroplast minor chlorophyll a-b binding protein of photosystem II	Dunaliella salina	gb|AEF79974.1	181	1	1	T	KFRVDGTGPAGFS	FHA KAPP	3.38809e-07	182.505	_VDGpTGPAGFSPGVGK_	4	2	713.324	0.95984	2.2785	2.1167		↑	↑		2.1976	0.0520613
gi|246880776	Photosystem II protein H (PsbH)	Dunaliella salina	gb|ACS95088.1	8	0.878591	1	T	ATGKNSTQTSTSQ	FHA KAPP	7.26848e-06	143.91	_NSpTQTSTSQEPGIVTPLGTLLRPLNSEAGK_	3	3	1059.53	1.4561	0.28716			↓			0.28716
gi|226520174	Predicted protein, containing pfam03460 nitrite/sulfite reductase ferredoxin-like half domain*	Micromonas sp. RCC299	gb|ACO66163.1	273	0.830024	1	T	NDNRFGTNFEGSP	CAMK2;CK2	0.19732	102.88	_FGpTNFEGSPEPIYGTQFLPR_	3	3	779.691	-0.097343	0.94456			→			0.94456
gi|226462438	Hypothetical protein MICPUCDRAFT_31359, containing pfam02896 PEP-utilising enzyme, TIM barrel domain*	Micromonas pusilla CCMP1545	gb|EEH59730.1	562	0.957753	1	S	SRGGMTSHAAVVA		0.221133	125.385	_GGMTpSHAAVVAR_	5	2	618.781	0.61806	Identified
gi|158277740	Pyruvate phosphate dikinase	Chlamydomonas reinhardtii	gb|EDP03507.1	506	0.876718	1	T	CQLGGMTSHAAVV	FHA KAPP	6.6887e-47	231.22	_GMYSAEGVLCQLGGMpTSHAAVVAR_	16	3	849.051	1.405	Identified	0.49803			↓		0.49803
gi|219741484	Unnamed protein product, containing cd00354 fructose-1,6-bisphosphatase domain*	Chlamydomonas	emb|CAW62303.1	280	0.986783	1	S	TNVTSPSTKAKLR		8.19054e-07	207.21	_GVFTNVTSPpSTK_	10	2	659.308	1.7566		Identified
gi|219741484	Unnamed protein product, containing cd00354 fructose-1,6-bisphosphatase domain*	Chlamydomonas	emb|CAW62303.1	278	0.977491	1	S	VFTNVTSPSTKAK	CK1;ERK/MAPK;Proline-directed	0.0520199	125.27	_GVFTNVTpSPSTK_	8	2	659.308	0.29014			Identified
gi|1173346	Sedoheptulose-1, 7-bisphosphatase, chloroplastic	Chlamydomonas reinhardtii	sp|P46284.1|S17P_CHLRE	123	0.972111	1	S	GTACVNSFGDEQL	CK2	6.4543e-12	262.31	_TASCAGTACVNpSFGDEQLAVDMVADK_	12	3	933.055	2.0821	0.39794	0.022992		↓	↓		0.210466	1.25972
gi|1173346	Sedoheptulose-1, 7-bisphosphatase, chloroplastic	Chlamydomonas reinhardtii	sp|P46284.1|S17P_CHLRE	118	0.804864	1	T	TASCAGTACVNSF		5.42912e-69	248.08	_TASCAGpTACVNSFGDEQLAVDMVADK_	7	3	933.055	3.0829			Identified
gi|246880744	ATP synthase CF1 alpha subunit	Dunaliella salina	gb|ACS95056.1	139	1	1	S	AAPGIVSRRSVYE		3.6105e-08	182.43	_AIEAAAPGIVpSR_	11	2	617.813	-0.34267		2.0404			↑		2.0404
	Other metabolisms (9)
gi|307109275	Hypothetical protein CHLNCDRAFT_57286, containing cd04301 N-Acyltransferase superfamily*	Chlorella variabilis	gb|EFN57513.1	32	1	1	S	ASRGARSPPRPAS	CDK1;CDK2;Proline-directed	0.325259	71.394	_GARpSPPR_	4	2	410.695	-1.6608		0.22058			↓		0.22058
gi|226514806	Predicted protein, containing cd01080 NADP binding domain of methylene-tetrahydrofolate dehydrogenase/cyclohydrolase*	Micromonas sp. RCC299	gb|ACO60802.1	234	0.999997	1	S	TVTIVHSRTPNSE	CK1	0.000529225	190.545	_DATVTIVHpSR_	9	2	589.782	0.177955		Identified	Identified
gi|158272921	Predicted protein, containing cd03424 ADP-ribose pyrophosphatase domain*	Chlamydomonas reinhardtii	gb|EDO98715.1	276	0.99996	1	S	GKMMLPSVYAAFL		0.0155	126.66	_M(ox)MLPpSVYAAFLSLEVLK_	5	2	1004.5	4.4671		Identified
gi|283139174	Glutamine synthetase II	Prototheca zopfii	gb|ADB12592.1	329	0.998021	1	T	LTGKHETSSMDDF		2.84058e-13	223.1	_HEpTSSMDDFSWGVANR_	3	2	959.875	1.7464	Identified	Identified
gi|227477517	Unnamed protein product, containing pfam00120 glutamine synthetase catalytic domain*	Helicosporidium	emb|CAY33684.1	331	0.850712	1	S	TGKHETSSMNDFS		3.8929e-06	241.86	_HETpSSMNDFSWGVANR_	4	2	959.383	2.4254	1.6869	Identified		↑			1.6869
gi|300259659	Hypothetical protein VOLCADRAFT_106657, containing cd04413 nucleoside diphosphate kinase Group I-like domain*	Volvox carteri f. nagariensis	gb|EFJ43885.1	161	0.997183	1	S	VIHGSDSPENGER	Proline-directed	0.00109845	162.97	_NVIHGSDpSPENGER_	8	2	795.831	1.2002		Identified
gi|158275991	Predicted protein,containing pfam03407 nucleotide-diphospho-sugar transferase domain*	Chlamydomonas reinhardtii	gb|EDP01766.1	202	0.989666	1	S	ENLYRDSDVEGMT	CK2;PKA	0.558926	28.036	_DpSDVEGM(ox)TDGFDER_	2	2	834.79	4.4067			Identified
gi|307106155	Hypothetical protein CHLNCDRAFT_48950, containing cd00831 chalcone and stilbene synthases domain*	Chlorella variabilis	gb|EFN54402.1	6	0.917595	1	S	_MVRCFSTIRFVV	CAMK2;CHK1	0.0558068	110.32	_CFpSTIR_	3	2	432.178	-0.68173	1.7535			↑			1.7535
gi|144576397	Arogenate dehydrogenase, putative	Ostreococcus lucimarinus CCE9901	gb|ABO94465.1	84	0.86986	1	T	GHTVIATSRGNYS		0.263882	93.109	_HFVDQGHTVIApTSR_	12	2	824.386	3.5082			Identified
	Transcription (22)
gi|300261198	Hypothetical protein VOLCADRAFT_82285, containing smart00658 RNA polymerase subunit 8*	Volvox carteri f. nagariensis	gb|EFJ45412.1	75	0.999999	2	S	LDATPGSEKYDAF		0.0910106	117.98	_FSLVLAWTLNLDApTPGpSEK_	17	3	741.344	0.132495	1.8537	2.2907		↑	↑		2.0722	0.14912
gi|300261198	Hypothetical protein VOLCADRAFT_82285, containing smart00658 RNA polymerase subunit 8*	Volvox carteri f. nagariensis	gb|EFJ45412.1	72	0.999999	2	T	TLNLDATPGSEKY	FHA KAPP;NEK6;Proline-directed	0.0910106	117.98	_FSLVLAWTLNLDApTPGpSEK_	14	3	741.344	0.132495	1.8537	2.2907		↑	↑		2.0722	0.14912
gi|261888185	Beta subunit of RNA polymerase	Volvox carteri f. nagariensis	gb|ACY06040.1	53	1	1	S	NSVNLHSCCVIKG		0.230841	95.363	_NSVNLHpSCCVIK_	7	2	755.831	-2.6384			Identified
gi|226460670	Predicted protein, containing pfam12767 transcriptional regulator of RNA polII, SAGA subunit*	Micromonas pusilla CCMP1545	gb|EEH57964.1	387	0.985384	1	T	YQAQHATAMQQQQ		6.41425e-05	184.015	_RQLYQAQHApTAMQQQQQQQQQQQQR_	10	3	1064.16	2.45615	Identified
gi|226455398	Set domain protein	Micromonas pusilla CCMP1545	gb|EEH52701.1	138	0.999993	1	S	FPPDEPSREYEPS		0.392677	85.753	_ATAPFPPDEPpSR_	11	2	682.798	2.68	0.25853	0.25337		↓	↓		0.25595	0.0142554
gi|226455398	Set domain protein	Micromonas pusilla CCMP1545	gb|EEH52701.1	129	1	2	T	AAAERATAPFPPD	PKA	0.524091	85.753	_ApTAPFPPDEPpSR_	2	2	722.781	3.0812		Identified
gi|226459527	Predicted protein, containing cd00268 DEAD-box helicases*	Micromonas pusilla CCMP1545	gb|EEH56822.1	373	1	1	S	CLHWALSAFKKGD		0.227257	95.531	_PCLHWALpSAFKK_	8	2	769.373	-3.5206			Identified
gi|300263278	Hypothetical protein VOLCADRAFT_120953, containing cd00268 DEAD-box helicases domain*	Volvox carteri f. nagariensis	gb|EFJ47479.1	147	0.991277	1	T	HACVGGTSVREDA		0.059322	139.525	_CHACVGGpTSVR_	8	2	642.255	-0.612125	0.16634	0.083665		↓	↓		0.125002	0.467671
gi|144578562	Predicted protein, containing cd00079 helicase superfamily C-terminal domain*	Ostreococcus lucimarinus CCE9901	gb|ABO96626.1	603	0.946005	1	Y	DIKNLPYVINLTL		0.122528	93.043	_NLPpYVINLTLPDR_	4	2	804.413	-4.5164			Identified
gi|307110542	Hypothetical protein CHLNCDRAFT_34097, containing pfam06424 PRP1 splicing factor domain*	Chlorella variabilis	gb|EFN58778.1	255	1	1	T	DPKGYLTDLKSVT		0.00711704	140.74	_GYLpTDLK_	4	2	445.207	1.3302	0.70455	0.54329		→	↓		0.62392	0.182761
gi|116060648	Unnamed protein product, containing pfam01555 DNA methylase domain*	Ostreococcus tauri	emb|CAL57126.1	420	1	1	S	LEVVAHSLKPRGR		0.311707	100.39	_EQEEWLEVVAHpSLK_	12	2	888.914	1.5813	Identified
gi|300264711	Hypothetical protein VOLCADRAFT_90657, containing cd03586 DNA Polymerase IV/Kappa domain*	Volvox carteri f. nagariensis	gb|EFJ48906.1	189	0.929653	3	S	GGGEMGSPGGGGG	Proline-directed	0.213979	24.58	_GGGGEM(ox)GpSPGGGGGDpSpSSSGGDGGGCGGGGR_	8	4	674.956	-0.35334			Identified
gi|307105557	Hypothetical protein CHLNCDRAFT_136511, containing cd07969 OBF_DNA_ligase_I domain*	Chlorella variabilis	gb|EFN53806.1	743	1	1	S	GSAAAASAKGAAG		0.0320279	125.24	_LVLPPPPSPGSAAAApSAK_	16	2	855.945	-4.3417		Identified
gi|300260920	Hypothetical protein VOLCADRAFT_94528, containing cl10720 Bud13 super family*	Volvox carteri f. nagariensis	gb|EFJ45136.1	177	1	2	S	RRQRHDSPDASPP	CAMK2;GSK3;PIM1/2;PKA/AKT;Proline-directed	0.000472546	203.795	_HDpSPDApSPPR_	3	3	413.479	-0.166495		Identified
gi|300260920	Hypothetical protein VOLCADRAFT_94528, containing cl10720 Bud13 super family*	Volvox carteri f. nagariensis	gb|EFJ45136.1	181	1	2	S	HDSPDASPPRRGT	CDK1;CDK2;CK1;Proline-directed	0.000472546	203.795	_HDpSPDApSPPR_	7	3	413.479	-0.166495		Identified
gi|226516726	Predicted protein, containing pfam01585 G-patch domain*	Micromonas sp. RCC299	gb|ACO62720.1	1372	1	1	T	AAEAFLTAAAEGA	FHA KAPP	0.488297	50.251	_AAEAFLpTAAAEGAADGDGVEDDGEEVR_	7	3	906.047	0.51431			0.96779			→	0.96779
gi|300257819	Hypothetical protein VOLCADRAFT_97975, containing TIGR02168 chromosome segregation protein SMC domain*	Volvox carteri f. nagariensis	gb|EFJ42063.1	1704	1	2	S	NGRDQDSVLTGAK		0.207601	86.414	_DQDpSVLpTGAKDQR_	4	2	796.821	1.6345			Identified
gi|300257819	Hypothetical protein VOLCADRAFT_97975, containing TIGR02168 chromosome segregation protein SMC domain*	Volvox carteri f. nagariensis	gb|EFJ42063.1	1707	1	2	T	DQDSVLTGAKDQR	CK1	0.207601	86.414	_DQDpSVLpTGAKDQR_	7	2	796.821	1.6345			Identified
gi|226519994	Predicted protein, containing cd06146 DEDDy 3'-5' exonuclease domain of Caenorhabditis elegans mut-7 and similar proteins*	Micromonas sp. RCC299	gb|ACO65984.1	11	0.999585	2	Y	SDHLYRYRRKVRA		0.290916	82.897	_MSHVpSDHLYRpYRR_	11	2	940.395	-1.0218	Identified
gi|116059545	Unnamed protein product, containing cd00116 Leucine-rich repeats, ribonuclease inhibitor-like subfamily*	Ostreococcus tauri	emb|CAL55252.1	10	0.983574	1	T	ANDARLTSIIVPR	FHA2 Rad53p;PKA	0.242107	80.483	_LpTSIIVPR_	2	2	489.773	3.7338			Identified
gi|116056593	Unnamed protein product, containing pfam01918 alba domain*	Ostreococcus tauri	emb|CAL52882.1	112	0.998407	2	S	EELDVHSPGYQAP	ERK/MAPK;Proline-directed	0.0286635	100.05	_IELATTSEELDVHpSPGpYQAPDTIMGK_	14	2	1481.65	2.4798		Identified
gi|116056593	Unnamed protein product, containing pfam01918 Alba domain*	Ostreococcus tauri	emb|CAL52882.1	115	0.839345	2	Y	DVHSPGYQAPDTI		0.0286635	100.05	_IELATTSEELDVHpSPGpYQAPDTIMGK_	17	2	1481.65	2.4798		Identified
	Protein synthesis (11)
gi|246880727	Elongation factor Tu	Dunaliella salina	gb|ACS95039.1	365	0.985714	1	S	QMRNPSSVAEEHS	CK2	2.93848	120.59	_NPSpSVAEEHSNK_	4	2	689.785	0.50875		Identified	Identified
gi|158271141	Eukaryotic translation elongation factor 1 alpha 2	Chlamydomonas reinhardtii	gb|EDO96967.1	72	1	1	T	ERERGVTIACTTK	CAMK2;PKA/AKT	0.000993333	145.13	_GVpTIACTTK_	3	2	515.736	0.14666			Identified
gi|144581407	Predicted protein, containing cd03710 a C-terminal portion of BipA or TypA having homology to the C terminal domains of the elongation factors EF-G and EF-2*	Ostreococcus lucimarinus CCE9901	gb|ABO99464.1	208	0.905172	1	T	RAGVASTSLEEAQ	CK2	0.142025	101.24	_AGVASpTSLEEAQK_	6	2	685.814	-0.16031			Identified
gi|226458332	Predicted protein, containing cd01885 elongation factor 2 domain*	Micromonas pusilla CCMP1545	gb|EEH55629.1	492	0.99998	1	S	AMKFSVSPVVRVA	Proline-directed	0.120684	126.53	_FSVpSPVVR_	4	2	485.742	1.377			Identified
gi|158283213	Ribosomal protein S3a	Chlamydomonas reinhardtii	gb|EDP08964.1	69	1	1	S	GRVFEVSLADLQK	CK2;PLK;PLK1	0.0207281	118.06	_VFEVpSLADLQK_	5	2	664.829	0.48786	2.7358			↑			2.7358
gi|158276036	Ribosomal protein S6	Chlamydomonas reinhardtii	gb|EDP01810.1	127	1	1	T	QELPGLTDEEKPR	CK2	0.476714	99.276	_KGEQELPGLpTDEEKPR_	10	3	635.97	0.51293		1.5576			↑		1.5576
gi|246880774	Ribosomal protein S9	Dunaliella salina	gb|ACS95086.1	174	1	1	S	GFLTQDSRVKERR		8.76349e-17	167.41	_GFLTQDpSR_	7	2	502.216	-0.339727			Identified
gi|246880774	Ribosomal protein S9	Dunaliella salina	gb|ACS95086.1	140	0.99992	1	S	EFPIENSMEESSK	CK2;GSK3;PLK;PLK1	0.000509065	231.31	_EFPIENpSMEESSK_	7	2	803.821	1.7975	0.93071	2.0549	2.1268	→	↑	↑	1.70414	0.393614
gi|246880750	Ribosomal protein S19	Dunaliella salina	gb|ACS95062.1	6	0.993045	1	T	_MPRSITKGPFVA	CAMK2;CHK1	0.0727616	136.89	_SIpTKGPFVAGHLLK_	3	3	516.616	-0.79305		Identified	Identified
gi|158274884	Ribosomal protein L12	Chlamydomonas reinhardtii	gb|EDP00664.1	27	0.985458	1	S	EVGAASSLAPKIG		0.138306	125.845	_VTGGEVGAASpSLAPK_	11	3	475.232	0.455415	8.1028		12.596	↑		↑	10.3494	0.306991
gi|226453916	Predicted protein, containing pfam07890 Rrp15p domain*	Micromonas pusilla CCMP1545	gb|EEH51223.1	252	0.890216	1	T	RLIQTATRGVVRL		1.69981	75.702	_LIQTApTR_	6	2	441.726	1.828			Identified
	Protein folding and transporting (4)
gi|300265001	Molecular chaperone	Volvox carteri f. nagariensis	gb|EFJ49194.1	407	0.999997	1	S	TGESYDSDDDDDM	CK1;CK2	0.00134431	161.355	_GTGESYDpSDDDDDM(ox)PR_	8	2	935.801	2.0113		Identified
gi|300266633	Hypothetical protein VOLCADRAFT_120515, containing cd00632 prefoldin beta domain*	Volvox carteri f. nagariensis	gb|EFJ50819.1	776	0.998827	4	S	LLSSEVSRLRAET	CK1	0.29191	109.91	_RSApSSLLpSpSEVpSR_	12	2	849.801	0.33753		0.0063346			↓		0.0063346
gi|300266633	Hypothetical protein VOLCADRAFT_120515, containing cd00632 prefoldin beta domain*	Volvox carteri f. nagariensis	gb|EFJ50819.1	773	0.988022	4	S	ASSLLSSEVSRLR	CK1;NEK6	0.29191	109.91	_RSApSSLLpSpSEVpSR_	9	2	849.801	0.33753		0.0060834			↓		0.0060834
gi|300266633	Hypothetical protein VOLCADRAFT_120515, containing cd00632 prefoldin beta domain*	Volvox carteri f. nagariensis	gb|EFJ50819.1	768	0.968516	4	S	DDRRSASSLLSSE	CAMK2;GSK3	0.29191	109.91	_RSApSSLLpSpSEVpSR_	4	2	849.801	0.33753		0.0060834			↓		0.0060834
	Protein degradation (9)
gi|307111867	Hypothetical protein CHLNCDRAFT_133427, containing cd00118 LysM domain*	Chlorella variabilis	gb|EFN60101.1	2290	1	2	S	HPELHISADALKI	NEK6	0.00112291	132.05	_QHApTEAFAEAWGQQEQQQQQQQQHPELHIpSADALK_	30	5	840.574	-0.81435	5.6149		12.019	↑		↑	8.81695	0.5136
gi|307111867	Hypothetical protein CHLNCDRAFT_133427, containing cd00118 LysM domain*	Chlorella variabilis	gb|EFN60101.1	2264	1	2	T	DDRQHATEAFAEA		0.00112291	132.05	_QHApTEAFAEAWGQQEQQQQQQQQHPELHIpSADALK_	4	5	840.574	-0.81435	5.6149		12.019	↑		↑	8.81695	0.5136
gi|158279575	Membrane AAA-metalloprotease	Chlamydomonas reinhardtii	gb|EDP05335.1	304	1	1	T	LVGPPGTGKTLLA		5.15255e-05	174.74	_GCLLVGPPGpTGK_	10	2	618.296	0.64987		1.7662			↑		1.7662
gi|116057890	Putative zinc protease PQQL	Ostreococcus tauri	emb|CAL54093.1	946	0.999983	1	T	FWREYITELYKSR		0.00523784	139.57	_EYIpTELYK_	4	2	569.757	0.31238			Identified
gi|226515734	Predicted protein, containing pfam08325 WLM domain*	Micromonas sp. RCC299	gb|ACO61729.1	331	0.989769	2	S	ERRWTCSQCTLVN		0.0793258	153.15	_RWTCpSQCpTLVNPER_	5	2	983.889	1.4203		Identified
gi|226515734	Predicted protein, containing pfam08325 WLM domain*	Micromonas sp. RCC299	gb|ACO61729.1	334	1	2	T	WTCSQCTLVNPER	CK1	0.0793258	153.15	_RWTCpSQCpTLVNPER_	8	2	983.889	1.4203		Identified
gi|300268516	20S proteasome alpha subunit E	Volvox carteri f. nagariensis	gb|EFJ52696.1	56	0.986369	1	S	VEKRVTSPLLEPS	CAMK2;ERK/MAPK;PKA;Proline-directed	0.178361	117.315	_VTpSPLLEPSSIEK_	3	2	740.371	3.57375		Identified
gi|300256553	Hypothetical protein VOLCADRAFT_109434, containing cd00195ubiquitin-conjugating enzyme E2, catalytic domain*	Volvox carteri f. nagariensis	gb|EFJ40816.1	6	1	1	S	_MLKLFSVKDKQK	CHK1;CK2	0.320143	70.263	_LFpSVKDK_	3	2	458.731	-1.8161		3.6229			↑		3.6229
gi|307104043	Hypothetical protein CHLNCDRAFT_139059, containing cd06456 peptidase family M3 dipeptidyl carboxypeptidase domain*	Chlorella variabilis	gb|EFN52299.1	261	0.983614	1	S	SITRASSGDIDNT	CAMK2;CHK1;CK1;PKD	1.18781e-07	168.71	_ASpSGDIDNTPIIEK_	3	2	770.351	1.7919		Identified
	Signaling (16)
gi|300256509	Hypothetical protein VOLCADRAFT_84366, containing cd07419 Arabidopsis thaliana Bsu1 phosphatase and related proteins, C-terminal metallophosphatase domain*	Volvox carteri f. nagariensis	gb|EFJ40773.1	497	1	1	S	GLVRQLSIDQLDN	CAMK2;CHK1;CHK1/2;PKD	0.145121	153.535	_QLpSIDQLDNEGR_	3	2	734.327	3.1617		0.14124	Identified		↓		0.14124
gi|300267736	Calmodulin	Volvox carteri f. nagariensis	gb|EFJ51918.1	105	1	1	S	DGNGFISAAELRH	CK2	2.74998e-07	174.57	_DGNGFIpSAAELR_	7	2	665.295	0.84705		Identified
gi|158279653	Predicted protein, containing cd00162 Really Interesting New Gene-finger domain*	Chlamydomonas reinhardtii	gb|EDP05413.1	37	1	2	S	GHAALLSVPPMLG		0.221692	116.21	_ARpTSSTGANGANGATHAGHAALLpSVPPM(ox)LGR_	24	3	1040.48	-1.7047		Identified
gi|158271168	Snf1-like protein kinase	Chlamydomonas reinhardtii	gb|EDO96994.1	173	1	2	S	KHEKFQSAPGSRV	GSK3	0.0163127	143.63	_FQpSAPGpSR_	3	2	505.181	1.6032			0.038049			↓	0.038049
gi|158271168	Snf1-like protein kinase	Chlamydomonas reinhardtii	gb|EDO96994.1	177	1	2	S	FQSAPGSRVGTPA	CK1	0.0163127	143.63	_FQpSAPGpSR_	7	2	505.181	1.6032			0.038049			↓	0.038049
gi|144580103	Predicted protein, containing COG0642 signal transduction histidine kinase*	Ostreococcus lucimarinus CCE9901	gb|ABO98164.1	54	0.999997	1	S	PPHAVASDDEEAQ	CK2	1.20697e-06	138.4	_PPHAVApSDDEEAQWTPTGANATAPSNALALSR_	7	3	1109.18	-1.2075		Identified
gi|300265146	Hypothetical protein VOLCADRAFT_59590, containing cd07830 catalytic domain of male germ cell-associated kinase-like serine/threonine kinases*	Volvox carteri f. nagariensis	gb|EFJ49339.1	156	0.999995	2	T	RSRPPYTDYVSTR		0.0235571	131.75	_SRPPYpTDpYVSTR_	6	2	801.323	2.3763		1.0313			→		1.0313
gi|300265146	Hypothetical protein VOLCADRAFT_59590, contain cd07830 catalytic domain of male germ cell-associated kinase-like serine/threonine kinases*	Volvox carteri f. nagariensis	gb|EFJ49339.1	158	0.999137	2	Y	RPPYTDYVSTRWY		0.0235571	131.75	_SRPPYpTDpYVSTR_	8	2	801.323	2.3763		1.0313			→		1.0313
gi|307105164	Hypothetical protein CHLNCDRAFT_136605, containing cd07834 catalytic domain of the serine/threonine kinase, mitogen-activated protein kinase*	Chlorella variabilis	gb|EFN53414.1	251	0.990227	1	Y	GEPNISYICSRYY		0.000383039	162.72	_GEPNISpYICSR_	7	2	688.289	2.373	0.49909	0.38842		↓	↓		0.443755	0.176348
gi|144579848	Predicted protein, containing cd02859 N-terminal Early set domain, a glycogen binding domain, associated with the catalytic domain of AMP-activated protein kinase beta subunit*	Ostreococcus lucimarinus CCE9901	gb|ABO97909.1	457	0.828373	1	S	QYAELDSALPKII		0.301529	97.298	_LELHAAQAHAAQALGQYAELDpSALPK_	22	3	932.795	-3.06			0.80019			→	0.80019
gi|144579669	Predicted protein, containing COG3706 a CheY-like receiver domain and a GGDEF domain*	Ostreococcus lucimarinus CCE9901	gb|ABO97731.1	133	0.999821	1	T	PLVKQNTANLWQH	CHK1;FHA2 Rad53p;PKD	0.219644	84.157	_QNpTANLWQHTVR_	3	2	774.359	4.5271	Identified
gi|144575813	Predicted protein, containing pfam06090 inositol-pentakisphosphate 2-kinase domain*	Ostreococcus lucimarinus CCE9901	gb|ABO93882.1	261	0.998704	3	T	VDARGVTADADVV	CAMK2;FHA KAPP	0.105985	121.45	_GVpTADADVVpSpTLSR_	3	2	815.812	2.4793			Identified
gi|144575813	Predicted protein, containing pfam06090 inositol-pentakisphosphate 2-kinase domain*	Ostreococcus lucimarinus CCE9901	gb|ABO93882.1	269	0.961899	3	T	DADVVSTLSRVLP		0.245029	116.27	_GVTADADVVpSTLSR_	11	2	735.845	2.1316		Identified	Identified
gi|144575813	Predicted protein, containing pfam06090 inositol-pentakisphosphate 2-kinase domain*	Ostreococcus lucimarinus CCE9901	gb|ABO93882.1	268	0.910332	3	S	ADADVVSTLSRVL		0.200457	118.86	_GVTADADVVpSTLSR_	10	2	735.845	1.99035		Identified	Identified
gi|158272259	Predicted protein, containing cd00130 PAS domain*	Chlamydomonas reinhardtii	gb|EDO98062.1	1861	0.967049	3	S	TTNQADSDDDDDD	CK2	0.3784	27.632	_HITpTNQADpSDDDDDDpTGGGGR_	9	2	1201.38	-5.6404	Identified
gi|158272259	Predicted protein, containing cd00130 PAS domain*	Chlamydomonas reinhardtii	gb|EDO98062.1	1868	0.965148	3	T	DDDDDDTGGGGRG		0.3784	27.632	_HITpTNQADpSDDDDDDpTGGGGR_	16	2	1201.38	-5.6404	Identified
	Miscellaneous (7)
gi|158280053	Predicted protein, containing cd00189 tetratricopeptide repeat domain*	Chlamydomonas reinhardtii	gb|EDP05812.1	202	0.999994	1	S	LLGRYDSPLAKLR	CAMK2;CHK1;CHK1/2;PKD;Proline-directed	0.154521	90.366	_YDpSPLAK_	3	2	437.191	-4.6129			Identified
gi|226454454	Predicted protein, containing cd07067 histidine phosphatase domain*	Micromonas pusilla CCMP1545	gb|EEH51760.1	111	0.984755	2	S	NGAPWESMAPRIY		0.115547	114.48	_TIQpTASLIPHPTLTPPNGAPWEpSMAPR_	23	3	1015.14	3.6044			Identified
gi|226454454	Predicted protein, containing cd07067 histidine phosphatase domain*	Micromonas pusilla CCMP1545	gb|EEH51760.1	92	0.875675	2	T	MLRTIQTASLIPH	FHA2 Rad53p	0.115547	114.48	_TIQpTASLIPHPTLTPPNGAPWEpSMAPR_	4	3	1015.14	3.6044			Identified
gi|300260789	Hypothetical protein VOLCADRAFT_94705, containing cd03483 MutL_Trans_MLH1 domain*	Volvox carteri f. nagariensis	gb|EFJ45006.1	794	0.982942	2	S	ATGSGVSGDPPSS	CK1	0.140753	95.78	_PPLLAEAApTGSGVpSGDPPSSSPASK_	14	2	1220.54	-3.8301		Identified
gi|300260789	Hypothetical protein VOLCADRAFT_94705, containing cd03483 MutL_Trans_MLH1 domain*	Volvox carteri f. nagariensis	gb|EFJ45006.1	789	0.789845	2	T	LLAEAATGSGVSG		0.140753	95.78	_PPLLAEAApTGSGVpSGDPPSSSPASK_	9	2	1220.54	-3.8301		Identified
gi|300265005	Hypothetical protein VOLCADRAFT_90100, containing cd00014 calponin homology domain*	Volvox carteri f. nagariensis	gb|EFJ49198.1	2730	0.96	1	T	RSRIEETMEVVLT	PLK1	0.176769	106.27	_IEEpTMEVVLTGLNK_	4	2	828.402	3.5192		Identified
gi|307106228	Hypothetical protein CHLNCDRAFT_11074, containing cd01427 haloacid dehalogenase-like hydrolases domain*	Chlorella variabilis	gb|EFN54474.1	69	0.780583	1	T	VTSGEVTHRHLSQ		0.00473231	132.26	_NLERMGFDPACFAGVVTSGEVpTHR_	22	3	910.744	-2.9815	Identified
	Function unknown (28)
gi|307106871	Hypothetical protein CHLNCDRAFT_135046, containing cd04591 CBS_pair_EriC_assoc_euk_bac domain*	Chlorella variabilis	gb|EFN55116.1	927	1	1	T	PGEAGGTPPRPPL	CDK1;CDK2;Proline-directed	0.00208625	143.51	_SLLQADAPPGEAGGpTPPR_	15	2	907.428	0.84688		Identified
gi|226454129	Predicted protein, containing cd00204 ANK, ankyrin repeats domain*	Micromonas pusilla CCMP1545	gb|EEH51436.1	358	1	1	S	DDAAFASLLRGPR		6.00941	79.701	_DGDDAAFApSLLR_	9	2	665.787	1.1471		Identified
gi|158274438	Predicted protein, no putative conserved domains have been detected*	Chlamydomonas reinhardtii	gb|EDP00221.1	198	1	1	S	DVVVCVSAELAPK		0.0277706	123.37	_TPADVVVCVpSAELAPK_	10	2	868.42	-4.2239		Identified
gi|226524519	Predicted protein, containing pfam06294 DUF1042 domain*	Micromonas sp. RCC299	gb|ACO70499.1	516	0.817435	4	S	SAMKQHSAYGGGG		0.450067	50.709	_QHpSAYGGGGGGGGpYDDYDGYGpYDDPpYGGGAR_	3	3	1127.69	-0.26908		Identified
gi|226524519	Predicted protein, containing pfam06294 DUF1042 domain*	Micromonas sp. RCC299	gb|ACO70499.1	539	0.789363	4	Y	YGYDDPYGGGARG	SRC	0.450067	50.709	_QHpSAYGGGGGGGGpYDDYDGYGpYDDPpYGGGAR_	26	3	1127.69	-0.26908		Identified
gi|300264889	Hypothetical protein VOLCADRAFT_117411, containing pfam12697 alpha/beta hydrolase family*	Volvox carteri f. nagariensis	gb|EFJ49083.1	236	0.786915	1	S	CGGDCGSCGNGRS		0.573289	49.249	_VGDCGCCGSGCGVDCGGDCGpSCGNGR_	21	4	694.965	0.8372	Identified
gi|300263359	Hypothetical protein VOLCADRAFT_91804, no putative conserved domains have been detected*	Volvox carteri f. nagariensis	gb|EFJ47560.1	47	1	2	T	GEGGRGTGDGGGN	PKA	0.0849671	63.121	_GpTGDGGGNDGGGGDGGGGDGGGpTDGGGGGGGGGDGGGGDGGGGDGGGDNGR_	2	7	559.473	2.478		Identified
gi|300263359	Hypothetical protein VOLCADRAFT_91804, no putative conserved domains have been detected*	Volvox carteri f. nagariensis	gb|EFJ47560.1	68	1	2	T	GGDGGGTDGGGGG		0.0849671	63.121	_GpTGDGGGNDGGGGDGGGGDGGGpTDGGGGGGGGGDGGGGDGGGGDGGGDNGR_	23	7	559.473	2.478		Identified
gi|300264488	Hypothetical protein VOLCADRAFT_90905, no putative conserved domains have been detected*	Volvox carteri f. nagariensis	gb|EFJ48684.1	102	1	4	S	SSKQPVSPPPSTQ	ERK/MAPK;GSK3;Proline-directed;WW GroupIV	0.17513	87.288	_QPVpSPPPpSpTQPpSK_	4	2	835.289	-3.7796			Identified
gi|300264488	Hypothetical protein VOLCADRAFT_90905, no putative conserved domains have been detected*	Volvox carteri f. nagariensis	gb|EFJ48684.1	106	1	4	S	PVSPPPSTQPSKK	CK1;GSK3	0.17513	87.288	_QPVpSPPPpSpTQPpSK_	8	2	835.289	-3.7796			Identified
gi|300264488	Hypothetical protein VOLCADRAFT_90905, no putative conserved domains have been detected*	Volvox carteri f. nagariensis	gb|EFJ48684.1	110	1	4	S	PPSTQPSKKQPLS	CK1	0.17513	87.288	_QPVpSPPPpSpTQPpSK_	12	2	835.289	-3.7796			Identified
gi|300264488	Hypothetical protein VOLCADRAFT_90905, no putative conserved domains have been detected*	Volvox carteri f. nagariensis	gb|EFJ48684.1	107	1	4	T	VSPPPSTQPSKKQ	FHA KAPP	0.17513	87.288	_QPVpSPPPpSpTQPpSK_	9	2	835.289	-3.7796			Identified
gi|226463257	Predicted protein, no putative conserved domains have been detected*	Micromonas pusilla CCMP1545	gb|EEH60535.1	155	0.999992	1	T	GGVGAGTAARARS		0.175757	115.14	_GGDSGGGGVGAGpTAARAR_	13	2	777.344	-2.9157		1.0416			→		1.0416
gi|300267726	Hypothetical protein VOLCADRAFT_86882, no putative conserved domains have been detected*	Volvox carteri f. nagariensis	gb|EFJ51908.1	539	0.999791	1	S	EDMRGTSTPDVRS	CAMK2;CK2	1.8088e-32	150.22	_GTpSTPDVR_	3	2	456.695	0.52747			0.34207			↓	0.34207
gi|226457710	Predicted protein, no putative conserved domains have been detected*	Micromonas pusilla CCMP1545	gb|EEH55008.1	109	0.999543	2	T	PGRRGTTSSQKSL	CAMK2	1.69981	88.518	_GTpTpSSQK_	3	2	434.646	1.6407			0.85908			→	0.85908
gi|226457710	Predicted protein, no putative conserved domains have been detected*	Micromonas pusilla CCMP1545	gb|EEH55008.1	110	0.991647	2	S	GRRGTTSSQKSLA	GSK3	1.69981	88.518	_GTpTpSSQK_	4	2	434.646	1.6407			0.44476			↓	0.44476
gi|226455999	Predicted protein, no putative conserved domains have been detected*	Micromonas pusilla CCMP1545	gb|EEH53301.1	52	0.999077	4	S	VTPTRFSIMTALY	AURORA;AURORA-1;PKA	0.366506	90.814	_FpSIMpTALYFAPpSALVPLVAGGVpSSLPK_	2	3	1019.46	-0.21698			1.5688			↑	1.5688
gi|226455999	Predicted protein, no putative conserved domains have been detected*	Micromonas pusilla CCMP1545	gb|EEH53301.1	62	0.996091	4	S	ALYFAPSALVPLV		0.366506	90.814	_FpSIMpTALYFAPpSALVPLVAGGVpSSLPK_	12	3	1019.46	-0.21698			1.5688			↑	1.5688
gi|226455999	Predicted protein, no putative conserved domains have been detected*	Micromonas pusilla CCMP1545	gb|EEH53301.1	55	0.988947	4	T	TRFSIMTALYFAP	CK1	0.366506	90.814	_FpSIMpTALYFAPpSALVPLVAGGVpSSLPK_	5	3	1019.46	-0.21698			1.5688			↑	1.5688
gi|226455999	Predicted protein, no putative conserved domains have been detected*	Micromonas pusilla CCMP1545	gb|EEH53301.1	73	0.799183	4	S	LVAGGVSSLPKHH		0.366506	90.814	_FpSIMpTALYFAPpSALVPLVAGGVpSSLPK_	23	3	1019.46	-0.21698			1.5688			↑	1.5688
gi|158274046	Predicted protein, no putative conserved domains have been detected*	Chlamydomonas reinhardtii	gb|EDO99831.1	3395	0.986729	2	T	GAGAGATGPAPPV	FHA KAPP	0.273207	91.352	_DpSSVAGAGAGApTGPAPPVGLSR_	12	2	1027.95	-5.0213	Identified
gi|158281006	Predicted protein, no putative conserved domains have been detected*	Chlamydomonas reinhardtii	gb|EDP06762.1	846	0.780195	1	T	QQATADTSADARG	CK2;FHA1 Rad53p	0.313058	110.28	_EQAPAQQATADpTSADAR_	12	2	905.884	1.165			Identified
gi|300255770	Hypothetical protein VOLCADRAFT_100201, no putative conserved domains have been detected*	Volvox carteri f. nagariensis	gb|EFJ40056.1	1093	0.989498	7	S	GGGGGGSRLMRLS		0.375932	28.048	_QPpSVpSpSpTGTGpTGpTGGGGGGpSR_	20	2	1162.79	4.4737	Identified
gi|300255770	Hypothetical protein VOLCADRAFT_100201, no putative conserved domains have been detected*	Volvox carteri f. nagariensis	gb|EFJ40056.1	1076	0.998989	7	S	SGTRQPSVSSTGT	CAMK2;CK1	0.375932	28.048	_QPpSVpSpSpTGTGpTGpTGGGGGGpSR_	3	2	1162.79	4.4737	Identified
gi|300255770	Hypothetical protein VOLCADRAFT_100201, no putative conserved domains have been detected*	Volvox carteri f. nagariensis	gb|EFJ40056.1	1078	0.931627	7	S	TRQPSVSSTGTGT		0.375932	28.048	_QPpSVpSpSpTGTGpTGpTGGGGGGpSR_	5	2	1162.79	4.4737	Identified
gi|300255770	Hypothetical protein VOLCADRAFT_100201, no putative conserved domains have been detected*	Volvox carteri f. nagariensis	gb|EFJ40056.1	1084	0.928172	7	T	SSTGTGTGTGGGG		0.375932	28.048	_QPpSVpSpSpTGTGpTGpTGGGGGGpSR_	11	2	1162.79	4.4737	Identified
gi|300255770	Hypothetical protein VOLCADRAFT_100201, no putative conserved domains have been detected*	Volvox carteri f. nagariensis	gb|EFJ40056.1	1086	0.92061	7	T	TGTGTGTGGGGGG		0.375932	28.048	_QPpSVpSpSpTGTGpTGpTGGGGGGpSR_	13	2	1162.79	4.4737	Identified
gi|300268296	Hypothetical protein VOLCADRAFT_86611, no putative conserved domains have been detected*	Volvox carteri f. nagariensis	gb|EFJ52477.1	83	0.879822	2	S	GEDEAESDDDDDD	CK2	0.378214	28.305	_HSPpYGGGEDEAEpSDDDDDDDR_	13	2	1228.37	-1.3428	Identified
a Database accession numbers from NCBInr. b The name of the proteins identified by LC-MS/MS and the functional categories of proteins according to the GO criteria, KEGG and NCBInr database. Protein names marked with an asterisk (*) have been edited by us depending on functional domain searching and similarity comparison according to the Gene Ontology criteria. c The plant species that the peptide…

## Sheet: Ambiguous phosphorylation sites
Supplemental Table S3. Phosphorylation proteins identified in D. salina cells using stable isotope dimethyl label coupled with Ti4+-IMAC enrichment and LC-MS/MS.
Gi Number(a)	Protein Name(b)	Species(c)	UniProtKB/GenBank(d)	Position(e)	Localization Probability(f)	Number of Phospho (STY)(g)	Amino Acid(h)	Sequence Window(i)	Motifs(j)	PEP(k)	Score(l)	Modified Sequence(m)	Position in peptide(n)	Charge(o)	m/z(p)	Mass Error[ppm](q)	Ratio H/L Normalized.Biol.1.Tech.2(r)	Ratio H/L Normalized.Biol.2.Tech.1(s)	Ratio H/L Normalized.Biol.3.Tech.1(t)	[0.66,1.5].Significant change.Biol.1(u)	[0.66,1.5].Significant change.Biol.2(v)	[0.66,1.5].Significant change.Biol.3(w)	Ratio H/L Normalized.AVERAGE(x)	Ratio H/L Normalized.RSD(y)
	Photosynthesis (8)
gi|158277740	Pyruvate phosphate dikinase	Chlamydomonas reinhardtii	gb|EDP03507.1	507	0.675031	1	S	QLGGMTSHAAVVA		0.318829	177.13	_GM(ox)YSAEGVLCQLGGMTpSHAAVVAR_	17	3	854.383	3.2949			0.62593			↓	0.62593
gi|109726687	LciD, limiting CO2 inducible protein	Chlamydomonas reinhardtii	gb|ABG45800.1	199	0.625334	1	S	GMKAGLSHSPVVG		0.00996188	131.33	_AGLpSHSPVVGGK_	4	2	594.792	1.7705		1.8671			↑		1.8671
gi|246880776	Photosystem II protein H	Dunaliella salina	gb|ACS95088.1	8	0.499952	1	T	ATGKNSTQTSTSQ	FHA KAPP	9.61274e-08	189.85	_NpSTQTSTSQEPGIVTPLGTLLRPLNSEAGK_	3	3	1059.53	1.4561	0.28716	Identified	Identified	↓			0.28716
gi|246880776	Photosystem II protein H	Dunaliella salina	gb|ACS95088.1	7	0.488792	1	S	MATGKNSTQTSTS	CK1;GSK3	9.61274e-08	189.85	_NpSTQTSTSQEPGIVTPLGTLLRPLNSEAGK_	2	3	1059.53	1.9694		Identified	Identified
gi|246880776	Photosystem II protein H	Dunaliella salina	gb|ACS95088.1	11	0.166665	1	S	KNSTQTSTSQEPG	CK1	9.99814e-23	204.67	_NpSTQTSTSQEPGIVTPLGTLLR_	6	3	794.063	1.9694		Identified
gi|246880776	Photosystem II protein H	Dunaliella salina	gb|ACS95088.1	13	0.166665	1	S	STQTSTSQEPGIV		9.99814e-23	204.67	_NpSTQTSTSQEPGIVTPLGTLLR_	8	3	794.063	1.9694		Identified
gi|246880776	Photosystem II protein H	Dunaliella salina	gb|ACS95088.1	10	0.166665	1	T	GKNSTQTSTSQEP	CK1;FHA KAPP	9.99814e-23	204.67	_NpSTQTSTSQEPGIVTPLGTLLR_	5	3	794.063	1.9694		Identified
gi|246880776	Photosystem II protein H	Dunaliella salina	gb|ACS95088.1	12	0.166665	1	T	NSTQTSTSQEPGI	CK2	9.99814e-23	204.67	_NpSTQTSTSQEPGIVTPLGTLLR_	7	3	794.063	1.9694		Identified
	Carbohydrate and energy metabolism (11)
gi|290465235	Phosphoglucomutase 1	Dunaliella salina	gb|ADD25038.1	163	0.714762	1	S	GIIMSASHNPGGP		1.36404e-08	218.74	_KHYGGIIMpSASHNPGGPEGDFGIK_	11	4	638.047	1.12172	0.35601	0.35222		↓	↓		0.354115	0.00756798
gi|158271413	Acetyl CoA synthetase	Chlamydomonas reinhardtii	gb|EDO97232.1	549	0.492892	1	T	SGHRIGTAEVESA	CAMK2	0.536952	65.587	_IGpTAEVESALTEHPDCAEAAVIGVDHALK_	3	3	1028.48	1.6147	Identified
gi|208463466	Glucose-6-phosphate isomerase	Dunaliella salina	gb|ACI29026.1	70	0.384274	1	S	AEKDLTSPLHTFE	Proline-directed	0.0636165	170.4	_DLpTSPLHTFEASTLDM(ox)PTGR_	4	3	762.343	2.7192	Identified	0.78114	0.83364		→	→	0.80739	0.0459792
gi|208463466	Glucose-6-phosphate isomerase	Dunaliella salina	gb|ACI29026.1	69	0.3588	1	T	DAEKDLTSPLHTF	FHA2 Rad53p	0.0318083	148.855	_DLpTSPLHTFEASTLDM(ox)PTGR_	3	3	762.343	1.81156	Identified	Identified
gi|168831498	Glyceraldehyde-3-phosphate dehydrogenase	Dunaliella salina	gb|ACA35006.1	250	0.333333	1	T	NIVPTTTGAAKAV	FHA KAPP	0.000553643	150.92	_AAALNIVPTTpTGAAK_	11	2	739.884	0.13284	1.233	Identified		→			1.233
gi|284177800	Glyceraldehyde-3-phosphate dehydrogenase	Nephroselmis olivacea	gb|ADB81493.1	60	0.333333	1	S	LNIVPTSTGAAKA		0.0226404	129.76	_AAALNIVPpTSTGAAK_	10	2	732.877	2.8861		Identified
gi|284177800	Glyceraldehyde-3-phosphate dehydrogenase	Nephroselmis olivacea	gb|ADB81493.1	59	0.333333	1	T	ALNIVPTSTGAAK		0.0226404	129.76	_AAALNIVPpTSTGAAK_	9	2	732.877	2.8861		Identified
gi|284177800	Glyceraldehyde-3-phosphate dehydrogenase	Nephroselmis olivacea	gb|ADB81493.1	61	0.333333	1	T	NIVPTSTGAAKAV	FHA KAPP	0.0226404	129.76	_AAALNIVPpTSTGAAK_	11	2	732.877	2.8861		Identified
gi|168831498	Glyceraldehyde-3-phosphate dehydrogenase	Dunaliella salina	gb|ACA35006.1	249	0.333333	1	T	LNIVPTTTGAAKA	FHA KAPP	0.00375794	150.825	_AAALNIVPpTTTGAAK_	10	2	739.884	1.54867		Identified
gi|168831498	Glyceraldehyde-3-phosphate dehydrogenase	Dunaliella salina	gb|ACA35006.1	248	0.333333	1	T	ALNIVPTTTGAAK		0.00375794	150.825	_AAALNIVPpTTTGAAK_	9	2	739.884	1.54867		Identified
gi|208463466	Glucose-6-phosphate isomerase	Dunaliella salina	gb|ACI29026.1	74	0.333327	1	T	LTSPLHTFEASTL	FHA KAPP	0.0636165	123.11	_DLpTSPLHTFEASTLDM(ox)PTGR_	8	3	762.343	2.7192	Identified
	Other metabolisms (2)
gi|300294856	S-adenosyl homocysteine hydrolase	Dunaliella salina	gb|ADJ96635.1	171	0.497376	1	S	PDPDSTSNAEFKI	CK2	0.00309198	161.52	_NLPDPDSpTSNAEFK_	9	2	807.838	2.9475	Identified
gi|300294856	S-adenosyl homocysteine hydrolase	Dunaliella salina	gb|ADJ96635.1	170	0.497376	1	T	LPDPDSTSNAEFK	FHA KAPP	0.00309198	161.52	_NLPDPDSpTSNAEFK_	8	2	807.838	2.9475	Identified
	Transcription (19)
gi|158273398	Argonaute-like protein	Chlamydomonas reinhardtii	gb|EDO99188.1	11	0.737203	2	T	CNIGFATTGGGGY		0.37517	45	_DQNCNIGFApTpTGGGGYGGGGGYGGGGGGGR_	10	3	932.348	-0.24281		Identified
gi|158273398	Argonaute-like protein	Chlamydomonas reinhardtii	gb|EDO99188.1	12	0.737203	2	T	NIGFATTGGGGYG		0.37517	45	_DQNCNIGFApTpTGGGGYGGGGGYGGGGGGGR_	11	3	932.348	-0.24281		Identified
gi|226519994	Predicted protein, containing cd06146 mut-7_like_exo, DEDDy 3'-5' exonuclease domain of Caenorhabditis elegans mut-7 and similar proteins*	Micromonas sp. RCC299	gb|ACO65984.1	5	0.688272	2	S	__MSHVSDHLYRY	CK1	0.290916	82.897	_MSHVpSDHLYRpYRR_	5	2	940.395	-1.0218	Identified
gi|300264711	Hypothetical protein VOLCADRAFT_90657, containing cd03586 DNA Polymerase IV/Kappa domain*	Volvox carteri f. nagariensis	gb|EFJ48906.1	197	0.524491	3	S	GGGGGDSSSSGGD		0.213979	24.58	_GGGGEM(ox)GpSPGGGGGDpSpSSSGGDGGGCGGGGR_	16	4	674.956	-0.35334			Identified
gi|300264711	Hypothetical protein VOLCADRAFT_90657, containing cd03586 DNA Polymerase IV/Kappa domain*	Volvox carteri f. nagariensis	gb|EFJ48906.1	198	0.515285	3	S	GGGGDSSSSGGDG		0.213979	24.58	_GGGGEM(ox)GpSPGGGGGDpSpSSSGGDGGGCGGGGR_	17	4	674.956	-0.35334			Identified
gi|300264711	Hypothetical protein VOLCADRAFT_90657, containing cd03586 DNA Polymerase IV/Kappa domain*	Volvox carteri f. nagariensis	gb|EFJ48906.1	199	0.515285	3	S	GGGDSSSSGGDGG		0.213979	24.58	_GGGGEM(ox)GpSPGGGGGDpSpSSSGGDGGGCGGGGR_	18	4	674.956	-0.35334			Identified
gi|300264711	Hypothetical protein VOLCADRAFT_90657, containing cd03586 DNA Polymerase IV/Kappa domain*	Volvox carteri f. nagariensis	gb|EFJ48906.1	200	0.515285	3	S	GGDSSSSGGDGGG	CK1;CK2	0.213979	24.58	_GGGGEM(ox)GpSPGGGGGDpSpSSSGGDGGGCGGGGR_	19	4	674.956	-0.35334			Identified
gi|300269009	Histone H2B	Volvox carteri f. nagariensis	gb|EFJ53189.1	92	0.498961	1	S	HPDTGISSKAMSI		23.8113	111.7	_QVHPDTGIpSSK_	9	2	624.785	1.7944		Identified
gi|300269009	Histone H2B	Volvox carteri f. nagariensis	gb|EFJ53189.1	93	0.498961	1	S	PDTGISSKAMSIM	CK1;F box bTrCP;GSK3	23.8113	111.7	_QVHPDTGIpSSK_	10	2	624.785	1.7944		Identified
gi|307106407	Hypothetical protein CHLNCDRAFT_135230, containing pfam03110 SBP domain*	Chlorella variabilis	gb|EFN54653.1	234	0.353104	1	S	EEMLWSSSLCEND	NEK6	0.166067	116.11	_LLPLPLQQGPEEMLWSpSSLCENDIEELLALDPGSYSYA_	17	4	1090.26	1.0268	Identified
gi|307106407	Hypothetical protein CHLNCDRAFT_135230, containing pfam03110 SBP domain*	Chlorella variabilis	gb|EFN54653.1	235	0.353104	1	S	EMLWSSSLCENDI	CK2	0.166067	116.11	_LLPLPLQQGPEEMLWSpSSLCENDIEELLALDPGSYSYA_	18	4	1090.26	1.0268	Identified
gi|226520484	Predicted protein, containing cd00590 RRM, RNA recognition motif*	Micromonas sp. RCC299	gb|ACO66473.1	158	0.349092	3	S	RSGARSSSSESSS	CK2;GSK3;PKA	0.377226	28.191	_pSSSSESpSSESDSESDSEpSESR_	2	2	1211.35	-5.4546	Identified
gi|226520484	Predicted protein, containing cd00590 RRM, RNA recognition motif*	Micromonas sp. RCC299	gb|ACO66473.1	157	0.342954	3	S	GRSGARSSSSESS	CK1	0.377226	28.191	_pSSSSESpSSESDSESDSEpSESR_	1	2	1211.35	-5.4546	Identified
gi|226520484	Predicted protein, containing cd00590 RRM, RNA recognition motif*	Micromonas sp. RCC299	gb|ACO66473.1	176	0.303257	3	S	SDSESESRRRKKR	CK1	0.377226	28.191	_pSSSSESpSSESDSESDSEpSESR_	20	2	1211.35	-5.4546	Identified
gi|226520484	Predicted protein, containing cd00590 RRM, RNA recognition motif*	Micromonas sp. RCC299	gb|ACO66473.1	174	0.264764	3	S	SESDSESESRRRK	CK1	0.377226	28.191	_pSSSSESpSSESDSESDSEpSESR_	18	2	1211.35	-5.4546	Identified
gi|226520484	Predicted protein, containing cd00590 RRM, RNA recognition motif*	Micromonas sp. RCC299	gb|ACO66473.1	170	0.22231	3	S	SESDSESDSESES	CK1;CK2;GSK3	0.377226	28.191	_pSSSSESpSSESDSESDSEpSESR_	14	2	1211.35	-5.4546	Identified
gi|226520484	Predicted protein, containing cd00590 RRM, RNA recognition motif*	Micromonas sp. RCC299	gb|ACO66473.1	163	0.210208	3	S	SSSSESSSESDSE	CK1	0.377226	28.191	_pSSSSESpSSESDSESDSEpSESR_	7	2	1211.35	-5.4546	Identified
gi|226520484	Predicted protein, containing cd00590 RRM, RNA recognition motif*	Micromonas sp. RCC299	gb|ACO66473.1	164	0.209384	3	S	SSSESSSESDSES	CK1;CK2;GSK3	0.377226	28.191	_pSSSSESpSSESDSESDSEpSESR_	8	2	1211.35	-5.4546	Identified
gi|226520484	Predicted protein, containing cd00590 RRM, RNA recognition motif*	Micromonas sp. RCC299	gb|ACO66473.1	172	0.149809	3	S	SDSESDSESESRR	CK1;CK2;GSK3	0.377226	28.191	_pSSSSESpSSESDSESDSEpSESR_	16	2	1211.35	-5.4546	Identified
	Protein folding and transporting (1)
gi|300266633	Hypothetical protein VOLCADRAFT_120515, containing cd00632 prefoldin beta domain*	Volvox carteri f. nagariensis	gb|EFJ50819.1	772	0.644011	4	S	SASSLLSSEVSRL	CK1;GSK3	0.29191	109.91	_RSApSSLLpSpSEVpSR_	8	2	849.801	0.33753		Identified
	Protein degradation (4)
gi|300720948	Deneddylase 1	Chlamydomonas reinhardtii	gb|ADK33603.1	129	0.404159	4	S	SSGGSGSSGTGSS		0.230408	6.3069	_HpYDSSGGSGpSpSGpTGSSGASGGGPR_	10	2	1194.86	-0.72817		Identified
gi|300720948	Deneddylase 1	Chlamydomonas reinhardtii	gb|ADK33603.1	130	0.404159	4	S	SGGSGSSGTGSSG	CK1;GSK3	0.230408	6.3069	_HpYDSSGGSGpSpSGpTGSSGASGGGPR_	11	2	1194.86	-0.72817		Identified
gi|300720948	Deneddylase 1	Chlamydomonas reinhardtii	gb|ADK33603.1	121	0.403899	4	Y	SNTLRHYDSSGGS		0.230408	6.3069	_HpYDSSGGSGpSpSGpTGSSGASGGGPR_	2	2	1194.86	-0.72817		Identified
gi|300720948	Deneddylase 1	Chlamydomonas reinhardtii	gb|ADK33603.1	132	0.394768	4	T	GSGSSGTGSSGAS	CK1;FHA KAPP	0.230408	6.3069	_HpYDSSGGSGpSpSGpTGSSGASGGGPR_	13	2	1194.86	-0.72817		Identified
	Signaling (34)
gi|158272259	Predicted protein, containing cd00130 PAS domain*	Chlamydomonas reinhardtii	gb|EDO98062.1	1856	0.723033	3	T	ASRHITTNQADSD	FHA KAPP	0.3784	27.632	_HITpTNQADpSDDDDDDpTGGGGR_	4	2	1201.38	-5.6404	Identified
gi|300266429	Hypothetical protein VOLCADRAFT_116796, containing cd00173 Src homology 2 (SH2) domain*	Volvox carteri f. nagariensis	gb|EFJ50616.1	343	0.5	1	S	TGEPRDSFDVTVE	AURORA;PKA	0.00851129	119.33	_DpSFDVTVEMLMQQQQPLQYPLQR_	2	4	719.336	-1.2621	0.33956			↓			0.33956
gi|300266429	Hypothetical protein VOLCADRAFT_116796, containing cd00173 Src homology 2 (SH2) domain*	Volvox carteri f. nagariensis	gb|EFJ50616.1	347	0.5	1	T	RDSFDVTVEMLMQ	PLK1	0.00851129	119.33	_DpSFDVTVEMLMQQQQPLQYPLQR_	6	4	719.336	-1.2621	0.33956			↓			0.33956
gi|226517734	Predicted protein, containing cd06609 STKc_MST3_like, Catalytic domain of Mammalian Ste20-like protein kinase 3-like Protein Serine/Threonine Kinases*	Micromonas sp. RCC299	gb|ACO63727.1	62	0.499997	1	S	SYLVQCSSPFVTK		0.184011	108.48	_EISYLVQCpSSPFVTK_	9	2	919.426	2.3368		Identified
gi|226517734	Predicted protein, containing cd06609 STKc_MST3_like, Catalytic domain of Mammalian Ste20-like protein kinase 3-like Protein Serine/Threonine Kinases*	Micromonas sp. RCC299	gb|ACO63727.1	63	0.499997	1	S	YLVQCSSPFVTKY	Polo box;Proline-directed	0.184011	108.48	_EISYLVQCpSSPFVTK_	10	2	919.426	2.3368		Identified
gi|158279653	Predicted protein, containing cd00162 RING-finger (Really Interesting New Gene) domain*	Chlamydomonas reinhardtii	gb|EDP05413.1	17	0.25	2	S	PRRARTSSTGANG	PKA	0.221692	116.21	_ARpTSSTGANGANGATHAGHAALLpSVPPM(ox)LGR_	4	3	1040.48	-1.7047		Identified
gi|158279653	Predicted protein, containing cd00162 RING-finger (Really Interesting New Gene) domain*	Chlamydomonas reinhardtii	gb|EDP05413.1	18	0.25	2	S	RRARTSSTGANGA	CAMK2;PKA/AKT	0.221692	116.21	_ARpTSSTGANGANGATHAGHAALLpSVPPM(ox)LGR_	5	3	1040.48	-1.7047		Identified
gi|158279653	Predicted protein, containing cd00162 RING-finger (Really Interesting New Gene) domain*	Chlamydomonas reinhardtii	gb|EDP05413.1	16	0.25	2	T	RPRRARTSSTGAN	CAMK2	0.221692	116.21	_ARpTSSTGANGANGATHAGHAALLpSVPPM(ox)LGR_	3	3	1040.48	-1.7047		Identified
gi|158279653	Predicted protein, containing cd00162 RING-finger (Really Interesting New Gene) domain*	Chlamydomonas reinhardtii	gb|EDP05413.1	19	0.25	2	T	RARTSSTGANGAN		0.221692	116.21	_ARpTSSTGANGANGATHAGHAALLpSVPPM(ox)LGR_	6	3	1040.48	-1.7047		Identified
gi|116000582	Protein involved in high osmolarity signaling pathway	Ostreococcus tauri	emb|CAL50262.1	583	0.259779	4	S	PKRSTSSSSSSSS	CK1;GSK3	0.261534	23.98	_pSpTpSSSSSSSSSSSSGSGSSSYSSSSSSYpSR_	4	2	1562.99	-2.9		Identified
gi|116000582	Protein involved in high osmolarity signaling pathway	Ostreococcus tauri	emb|CAL50262.1	582	0.259769	4	S	APKRSTSSSSSSS	CAMK2;GSK3;PKA;PKA/AKT	0.261534	23.98	_pSpTpSSSSSSSSSSSSGSGSSSYSSSSSSYpSR_	3	2	1562.99	-2.9		Identified
gi|116000582	Protein involved in high osmolarity signaling pathway	Ostreococcus tauri	emb|CAL50262.1	581	0.259759	4	T	TAPKRSTSSSSSS	FHA KAPP;PKA	0.261534	23.98	_pSpTpSSSSSSSSSSSSGSGSSSYSSSSSSYpSR_	2	2	1562.99	-2.9		Identified
gi|116000582	Protein involved in high osmolarity signaling pathway	Ostreococcus tauri	emb|CAL50262.1	580	0.25975	4	S	KTAPKRSTSSSSS	GSK3	0.261534	23.98	_pSpTpSSSSSSSSSSSSGSGSSSYSSSSSSYpSR_	1	2	1562.99	-2.9		Identified
gi|116000582	Protein involved in high osmolarity signaling pathway	Ostreococcus tauri	emb|CAL50262.1	584	0.23554	4	S	KRSTSSSSSSSSS	CK1;GSK3	0.261534	23.98	_pSpTpSSSSSSSSSSSSGSGSSSYSSSSSSYpSR_	5	2	1562.99	-2.9		Identified
gi|116000582	Protein involved in high osmolarity signaling pathway	Ostreococcus tauri	emb|CAL50262.1	608	0.134617	4	S	SSSSSYSRSSSRS	CK1;GSK3	0.261534	23.98	_pSpTpSSSSSSSSSSSSGSGSSSYSSSSSSYpSR_	29	2	1562.99	-2.9		Identified
gi|116000582	Protein involved in high osmolarity signaling pathway	Ostreococcus tauri	emb|CAL50262.1	585	0.126183	4	S	RSTSSSSSSSSSS	CK1;GSK3	0.261534	23.98	_pSpTpSSSSSSSSSSSSGSGSSSYSSSSSSYpSR_	6	2	1562.99	-2.9		Identified
gi|116000582	Protein involved in high osmolarity signaling pathway	Ostreococcus tauri	emb|CAL50262.1	586	0.126183	4	S	STSSSSSSSSSSS	CK1;GSK3	0.261534	23.98	_pSpTpSSSSSSSSSSSSGSGSSSYSSSSSSYpSR_	7	2	1562.99	-2.9		Identified
gi|116000582	Protein involved in high osmolarity signaling pathway	Ostreococcus tauri	emb|CAL50262.1	587	0.126183	4	S	TSSSSSSSSSSSS	CK1;GSK3	0.261534	23.98	_pSpTpSSSSSSSSSSSSGSGSSSYSSSSSSYpSR_	8	2	1562.99	-2.9		Identified
gi|116000582	Protein involved in high osmolarity signaling pathway	Ostreococcus tauri	emb|CAL50262.1	588	0.126183	4	S	SSSSSSSSSSSSG	CK1;GSK3	0.261534	23.98	_pSpTpSSSSSSSSSSSSGSGSSSYSSSSSSYpSR_	9	2	1562.99	-2.9		Identified
gi|116000582	Protein involved in high osmolarity signaling pathway	Ostreococcus tauri	emb|CAL50262.1	589	0.126183	4	S	SSSSSSSSSSSGS	CK1;GSK3	0.261534	23.98	_pSpTpSSSSSSSSSSSSGSGSSSYSSSSSSYpSR_	10	2	1562.99	-2.9		Identified
gi|116000582	Protein involved in high osmolarity signaling pathway	Ostreococcus tauri	emb|CAL50262.1	590	0.126183	4	S	SSSSSSSSSSGSG	CK1	0.261534	23.98	_pSpTpSSSSSSSSSSSSGSGSSSYSSSSSSYpSR_	11	2	1562.99	-2.9		Identified
gi|116000582	Protein involved in high osmolarity signaling pathway	Ostreococcus tauri	emb|CAL50262.1	591	0.126183	4	S	SSSSSSSSSGSGS	CK1;GSK3	0.261534	23.98	_pSpTpSSSSSSSSSSSSGSGSSSYSSSSSSYpSR_	12	2	1562.99	-2.9		Identified
gi|116000582	Protein involved in high osmolarity signaling pathway	Ostreococcus tauri	emb|CAL50262.1	592	0.126183	4	S	SSSSSSSSGSGSS	CK1	0.261534	23.98	_pSpTpSSSSSSSSSSSSGSGSSSYSSSSSSYpSR_	13	2	1562.99	-2.9		Identified
gi|116000582	Protein involved in high osmolarity signaling pathway	Ostreococcus tauri	emb|CAL50262.1	593	0.126183	4	S	SSSSSSSGSGSSS	CK1;GSK3	0.261534	23.98	_pSpTpSSSSSSSSSSSSGSGSSSYSSSSSSYpSR_	14	2	1562.99	-2.9		Identified
gi|116000582	Protein involved in high osmolarity signaling pathway	Ostreococcus tauri	emb|CAL50262.1	595	0.125228	4	S	SSSSSGSGSSSYS	CK1;GSK3	0.261534	23.98	_pSpTpSSSSSSSSSSSSGSGSSSYSSSSSSYpSR_	16	2	1562.99	-2.9		Identified
gi|116000582	Protein involved in high osmolarity signaling pathway	Ostreococcus tauri	emb|CAL50262.1	598	0.121166	4	S	SSGSGSSSYSSSS	CK1;GSK3	0.261534	23.98	_pSpTpSSSSSSSSSSSSGSGSSSYSSSSSSYpSR_	19	2	1562.99	-2.9		Identified
gi|116000582	Protein involved in high osmolarity signaling pathway	Ostreococcus tauri	emb|CAL50262.1	599	0.121165	4	S	SGSGSSSYSSSSS	CK1;GSK3	0.261534	23.98	_pSpTpSSSSSSSSSSSSGSGSSSYSSSSSSYpSR_	20	2	1562.99	-2.9		Identified
gi|116000582	Protein involved in high osmolarity signaling pathway	Ostreococcus tauri	emb|CAL50262.1	597	0.121164	4	S	SSSGSGSSSYSSS	CK1;GSK3	0.261534	23.98	_pSpTpSSSSSSSSSSSSGSGSSSYSSSSSSYpSR_	18	2	1562.99	-2.9		Identified
gi|116000582	Protein involved in high osmolarity signaling pathway	Ostreococcus tauri	emb|CAL50262.1	601	0.121158	4	S	SGSSSYSSSSSSY	CK1;GSK3	0.261534	23.98	_pSpTpSSSSSSSSSSSSGSGSSSYSSSSSSYpSR_	22	2	1562.99	-2.9		Identified
gi|116000582	Protein involved in high osmolarity signaling pathway	Ostreococcus tauri	emb|CAL50262.1	602	0.121154	4	S	GSSSYSSSSSSYS	CK1;GSK3	0.261534	23.98	_pSpTpSSSSSSSSSSSSGSGSSSYSSSSSSYpSR_	23	2	1562.99	-2.9		Identified
gi|116000582	Protein involved in high osmolarity signaling pathway	Ostreococcus tauri	emb|CAL50262.1	603	0.120635	4	S	SSSYSSSSSSYSR	CK1	0.261534	23.98	_pSpTpSSSSSSSSSSSSGSGSSSYSSSSSSYpSR_	24	2	1562.99	-2.9		Identified
gi|116000582	Protein involved in high osmolarity signaling pathway	Ostreococcus tauri	emb|CAL50262.1	604	0.120627	4	S	SSYSSSSSSYSRS	CK1;GSK3	0.261534	23.98	_pSpTpSSSSSSSSSSSSGSGSSSYSSSSSSYpSR_	25	2	1562.99	-2.9		Identified
gi|116000582	Protein involved in high osmolarity signaling pathway	Ostreococcus tauri	emb|CAL50262.1	605	0.12062	4	S	SYSSSSSSYSRSS	CK1	0.261534	23.98	_pSpTpSSSSSSSSSSSSGSGSSSYSSSSSSYpSR_	26	2	1562.99	-2.9		Identified
gi|116000582	Protein involved in high osmolarity signaling pathway	Ostreococcus tauri	emb|CAL50262.1	606	0.120612	4	S	YSSSSSSYSRSSS	CK1;GSK3	0.261534	23.98	_pSpTpSSSSSSSSSSSSGSGSSSYSSSSSSYpSR_	27	2	1562.99	-2.9		Identified
	Membrane and transport (1)
gi|226463601	Predicted protein, containing pfam01529 zf-DHHC, DHHC palmitoyltransferase*	Micromonas pusilla CCMP1545	gb|EEH60879.1	466	0.561723	1	T	ENAPEDTMGKLMH	PLK1	0.379591	28.308	_DEESMQGDVEGDENAPEDpTMGK_	19	2	1231.95	-3.8754	Identified
	Cell structure (1)
gi|1279362	SF-assemblin	Dunaliella bioculata	emb|CAA62413.1	25	0.666578	2	T	RSSVLTTTGSAIK	FHA KAPP	9.72072e-09	219.485	_SSVLTpTTGpSAIK_	6	2	662.793	2.83885		Identified
	Cell division, differentiation and fate (1)
gi|334851187	Cell division protein	Schizomeris leibleinii	gb|AEH05359.1	1419	0.622386	1	T	KLKLHNTFYTFST	NEK6	0.300141	97.524	_LHNpTFYTFSTNIK_	4	2	833.387	5.5462		Identified
	Miscellaneous (2)
gi|226516972	Predicted protein, containing cd00200 WD40 domain*	Micromonas sp. RCC299	gb|ACO62966.1	516	0.467338	1	S	AWTFGSSTPARTL	CK1	0.23296	100.47	_ICAWTFGSpSTPAR_	9	3	511.89	-1.7781	Identified
gi|226516972	Predicted protein, containing cd00200 WD40 domain*	Micromonas sp. RCC299	gb|ACO62966.1	517	0.467338	1	T	WTFGSSTPARTLR	CDK1;CDK2;Polo box;Proline-directed	0.23296	100.47	_ICAWTFGSpSTPAR_	10	3	511.89	-1.7781	Identified
	Function unknown (39)
gi|307105757	Expressed protein, containing pfam01469, Pentapeptide_2, Pentapeptide repeats (8 copies)*	Chlorella variabilis	gb|EFN54005.1	207	0.5	1	S	CRQRGTSFVAAGA	CAMK2;PKA/AKT	0.316012	81.405	_GpTSFVAAGAVR_	3	2	558.266	0.50696	Identified
gi|307105757	Expressed protein, containing pfam01469, Pentapeptide_2, Pentapeptide repeats (8 copies)*	Chlorella variabilis	gb|EFN54005.1	206	0.5	1	T	YCRQRGTSFVAAG	PKA	0.316012	81.405	_GpTSFVAAGAVR_	2	2	558.266	0.50696	Identified
gi|307104870	Hypothetical protein CHLNCDRAFT_59750, containing pfam09430 DUF2012 domain*	Chlorella variabilis	gb|EFN53122.1	187	0.5	1	T	RDRGAATPATIAA	Proline-directed	0.217239	107.78	_GAApTPATIAAAAQR_	4	3	450.557	0.015807			Identified
gi|307104870	Hypothetical protein CHLNCDRAFT_59750, containing pfam09430 DUF2012 domain*	Chlorella variabilis	gb|EFN53122.1	190	0.5	1	T	GAATPATIAAAAQ	FHA KAPP	0.217239	107.78	_GAApTPATIAAAAQR_	7	3	450.557	0.015807			Identified
gi|300266307	Hypothetical protein VOLCADRAFT_103955, containing pfam01841 Transglut_core, Transglutaminase-like superfamily*	Volvox carteri f. nagariensis	gb|EFJ50495.1	275	0.621845	1	T	DVTRRYTAQWRPE	CAMK2;CHK1;PKA;PKD	0.00268529	141.59	_RYpTAQWRPEVLPR_	3	3	584.63	-2.9507	Identified
gi|226524519	Predicted protein, containing pfam06294 DUF1042*	Micromonas sp. RCC299	gb|ACO70499.1	527	0.54179	4	Y	GGGGGGYDDYDGY		0.450067	50.709	_QHpSAYGGGGGGGGpYDDYDGYGpYDDPpYGGGAR_	14	3	1127.69	-0.26908		Identified
gi|226524519	Predicted protein, containing pfam06294 DUF1042*	Micromonas sp. RCC299	gb|ACO70499.1	535	0.540694	4	Y	DYDGYGYDDPYGG		0.450067	50.709	_QHpSAYGGGGGGGGpYDDYDGYGpYDDPpYGGGAR_	22	3	1127.69	-0.26908		Identified
gi|226454881	Predicted protein, containing cd00077 HDc, Metal dependent phosphohydrolases with conserved 'HD' motif*	Micromonas pusilla CCMP1545	gb|EEH52186.1	236	0.377635	1	S	GRERRESGNEEEA	CAMK2;CK2;PKA;PKA/AKT	0.382318	35.44	_EpSGNEEEAEAEDGDDDDDDDATESR_	2	2	1397.96	-1.4686	Identified
gi|300255770	Hypothetical protein VOLCADRAFT_100201, no putative conserved domains have been detected*	Volvox carteri f. nagariensis	gb|EFJ40056.1	1079	0.748547	7	S	RQPSVSSTGTGTG	CK1	0.375932	28.048	_QPpSVpSpSpTGTGpTGpTGGGGGGpSR_	6	2	1162.79	4.4737	Identified
gi|300255770	Hypothetical protein VOLCADRAFT_100201, no putative conserved domains have been detected*	Volvox carteri f. nagariensis	gb|EFJ40056.1	1080	0.748547	7	T	QPSVSSTGTGTGT		0.375932	28.048	_QPpSVpSpSpTGTGpTGpTGGGGGGpSR_	7	2	1162.79	4.4737	Identified
gi|300268296	Hypothetical protein VOLCADRAFT_86611, no putative conserved domains have been detected*	Volvox carteri f. nagariensis	gb|EFJ52477.1	74	0.702851	2	Y	PQRHSPYGGGEDE		0.378214	28.305	_HSPpYGGGEDEAEpSDDDDDDDR_	4	2	1228.37	-1.3428	Identified
gi|300260483	Hypothetical protein VOLCADRAFT_95024, no putative conserved domains have been detected*	Volvox carteri f. nagariensis	gb|EFJ44702.1	704	0.490553	1	S	PGPVAESSLDPRT	CK2	0.1922	112.93	_AGTLAPLTFPEEVLTTAPGPVAEpSSLDPR_	24	4	754.878	-0.85135	Identified
gi|300260483	Hypothetical protein VOLCADRAFT_95024, no putative conserved domains have been detected*	Volvox carteri f. nagariensis	gb|EFJ44702.1	705	0.490553	1	S	GPVAESSLDPRTP	PLK1	0.1922	112.93	_AGTLAPLTFPEEVLTTAPGPVAEpSSLDPR_	25	4	754.878	-0.85135	Identified
gi|300263859	Hypothetical protein VOLCADRAFT_91243, no putative conserved domains have been detected*	Volvox carteri f. nagariensis	gb|EFJ48057.1	680	0.483733	1	S	GGSGSGSGSGGDS	CK1	0.495755	41.109	_GSGSGGGSGSGpSGSGGDSGSASAR_	12	2	961.859	-3.7979		Identified
gi|226519315	Predicted protein, no putative conserved domains have been detected*	Micromonas sp. RCC299	gb|ACO65306.1	784	0.706659	1	Y	DAMTALYVAEARA	EGFR	0.31841	92.254	_NAGTAPAGGDAM(ox)TALpYVAEAR_	16	2	1051.96	-5.6237	Identified
gi|226457170	Predicted protein, no putative conserved domains have been detected*	Micromonas pusilla CCMP1545	gb|EEH54470.1	272	0.6	3	S	GGRGGASSDASSD	GSK3	0.496798	37.633	_GGASpSDApSSDDDGGDEGMEDpTDDER_	4	2	1365.38	5.1047		Identified
gi|226457170	Predicted protein, no putative conserved domains have been detected*	Micromonas pusilla CCMP1545	gb|EEH54470.1	273	0.6	3	S	GRGGASSDASSDD	GSK3	0.496798	37.633	_GGASpSDApSSDDDGGDEGMEDpTDDER_	5	2	1365.38	5.1047		Identified
gi|226457170	Predicted protein, no putative conserved domains have been detected*	Micromonas pusilla CCMP1545	gb|EEH54470.1	276	0.6	3	S	GASSDASSDDDGG	CK1;CK2	0.496798	37.633	_GGASpSDApSSDDDGGDEGMEDpTDDER_	8	2	1365.38	5.1047		Identified
gi|226457170	Predicted protein, no putative conserved domains have been detected*	Micromonas pusilla CCMP1545	gb|EEH54470.1	277	0.6	3	S	ASSDASSDDDGGD	CK1;CK2	0.496798	37.633	_GGASpSDApSSDDDGGDEGMEDpTDDER_	9	2	1365.38	5.1047		Identified
gi|226457170	Predicted protein, no putative conserved domains have been detected*	Micromonas pusilla CCMP1545	gb|EEH54470.1	289	0.6	3	T	DEGMEDTDDEREA	CK2	0.496798	37.633	_GGASpSDApSSDDDGGDEGMEDpTDDER_	21	2	1365.38	5.1047		Identified
gi|158272774	Predicted protein, no putative conserved domains have been detected*	Chlamydomonas reinhardtii	gb|EDO98570.1	497	0.589461	4	S	GAGSDGSDGGRSS	CK1	0.372719	22.383	_GSEPGGApSDpSGSpSGSTGAGSDGpSDGGR_	23	2	1288.38	-2.4035	Identified
gi|158272774	Predicted protein, no putative conserved domains have been detected*	Chlamydomonas reinhardtii	gb|EDO98570.1	482	0.518706	4	S	SEPGGASDSGSSG	GSK3	0.372719	22.383	_GSEPGGApSDpSGSpSGSTGAGSDGpSDGGR_	8	2	1288.38	-2.4035	Identified
gi|158272774	Predicted protein, no putative conserved domains have been detected*	Chlamydomonas reinhardtii	gb|EDO98570.1	487	0.504699	4	S	ASDSGSSGSTGAG	CK1	0.372719	22.383	_GSEPGGApSDpSGSpSGSTGAGSDGpSDGGR_	13	2	1288.38	-2.4035	Identified
gi|158274046	Predicted protein, no putative conserved domains have been detected*	Chlamydomonas reinhardtii	gb|EDO99831.1	3385	0.500003	2	S	ASESRDSSVAGAG	CK1;PKA	0.273207	91.352	_DpSSVAGAGAGApTGPAPPVGLSR_	2	2	1027.95	-5.0213	Identified
gi|158274046	Predicted protein, no putative conserved domains have been detected*	Chlamydomonas reinhardtii	gb|EDO99831.1	3386	0.500003	2	S	SESRDSSVAGAGA	CAMK2;CK1;PLK1	0.273207	91.352	_DpSSVAGAGAGApTGPAPPVGLSR_	3	2	1027.95	-5.0213	Identified
gi|158278092	Predicted protein, no putative conserved domains have been detected*	Chlamydomonas reinhardtii	gb|EDP03858.1	53	0.5	1	S	AAGQPTSPRARSM	CDK1;ERK/MAPK;Proline-directed;WW GroupIV	17134900000	84.382	_AEAAAGQPpTSPR_	10	2	618.274	2.5459	Identified
gi|158278092	Predicted protein, no putative conserved domains have been detected*	Chlamydomonas reinhardtii	gb|EDP03858.1	52	0.5	1	T	AAAGQPTSPRARS		17134900000	84.382	_AEAAAGQPpTSPR_	9	2	618.274	2.5459	Identified
gi|158273252	Predicted protein, no putative conserved domains have been detected*	Chlamydomonas reinhardtii	gb|EDO99043.1	142	0.479623	3	S	LTFEIRSSSPQAG		0.35154	33.564	_pSSSPQAGDGGpSpSSGSGSGNTGGGSSTR_	1	3	842.62	-3.0587		Identified
gi|158272774	Predicted protein, no putative conserved domains have been detected*	Chlamydomonas reinhardtii	gb|EDO98570.1	484	0.475705	4	S	PGGASDSGSSGST		0.372719	22.383	_GSEPGGApSDpSGSpSGSTGAGSDGpSDGGR_	10	2	1288.38	-2.4035	Identified
gi|158273252	Predicted protein, no putative conserved domains have been detected*	Chlamydomonas reinhardtii	gb|EDO99043.1	153	0.35314	3	S	AGDGGSSSGSGSG		0.35154	33.564	_pSSSPQAGDGGpSpSSGSGSGNTGGGSSTR_	12	3	842.62	-3.0587		Identified
gi|158273252	Predicted protein, no putative conserved domains have been detected*	Chlamydomonas reinhardtii	gb|EDO99043.1	152	0.349048	3	S	QAGDGGSSSGSGS	GSK3	0.35154	33.564	_pSSSPQAGDGGpSpSSGSGSGNTGGGSSTR_	11	3	842.62	-3.0587		Identified
gi|158268633	Predicted protein, no putative conserved domains have been detected*	Chlamydomonas reinhardtii	gb|EDO95690.1	56	0.183529	1	S	GQGGVESAATWAH		0.326581	84.172	_DGQDGADGAEQMLSDALGQGGVEpSAATWAHMGGGDSEDTAAGGAGSGNER_	24	4	1200.99	-2.1025		Identified
gi|158268633	Predicted protein, no putative conserved domains have been detected*	Chlamydomonas reinhardtii	gb|EDO95690.1	59	0.183529	1	T	GVESAATWAHMGG	CK1	0.326581	84.172	_DGQDGADGAEQMLSDALGQGGVEpSAATWAHMGGGDSEDTAAGGAGSGNER_	27	4	1200.99	-2.1025		Identified
gi|226516237	Predicted protein, no putative conserved domains have been detected*	Micromonas sp. RCC299	gb|ACO62232.1	97	0.177235	3	S	AAAPAQSTSSWDS		0.360452	78.201	_QESFAAAAPAQpSpTSSWDpSPSSGSGGSSNAYSWDSGGSSSYSSAGSAK_	12	4	1184.2	1.7091		Identified
gi|226516237	Predicted protein, no putative conserved domains have been detected*	Micromonas sp. RCC299	gb|ACO62232.1	99	0.177235	3	S	APAQSTSSWDSPS	CK2;GSK3	0.360452	78.201	_QESFAAAAPAQpSpTSSWDpSPSSGSGGSSNAYSWDSGGSSSYSSAGSAK_	14	4	1184.2	1.7091		Identified
gi|226516237	Predicted protein, no putative conserved domains have been detected*	Micromonas sp. RCC299	gb|ACO62232.1	98	0.177235	3	T	AAPAQSTSSWDSP		0.360452	78.201	_QESFAAAAPAQpSpTSSWDpSPSSGSGGSSNAYSWDSGGSSSYSSAGSAK_	13	4	1184.2	1.7091		Identified
gi|226516237	Predicted protein, no putative conserved domains have been detected*	Micromonas sp. RCC299	gb|ACO62232.1	105	0.150516	3	S	SSWDSPSSGSGGS		0.360452	78.201	_QESFAAAAPAQpSpTSSWDpSPSSGSGGSSNAYSWDSGGSSSYSSAGSAK_	20	4	1184.2	1.7091		Identified
gi|226516237	Predicted protein, no putative conserved domains have been detected*	Micromonas sp. RCC299	gb|ACO62232.1	106	0.150516	3	S	SWDSPSSGSGGSS	CK1	0.360452	78.201	_QESFAAAAPAQpSpTSSWDpSPSSGSGGSSNAYSWDSGGSSSYSSAGSAK_	21	4	1184.2	1.7091		Identified
gi|226516237	Predicted protein, no putative conserved domains have been detected*	Micromonas sp. RCC299	gb|ACO62232.1	103	0.150282	3	S	STSSWDSPSSGSG	CK1;Proline-directed	0.360452	78.201	_QESFAAAAPAQpSpTSSWDpSPSSGSGGSSNAYSWDSGGSSSYSSAGSAK_	18	4	1184.2	1.7091		Identified
a Database accession numbers from NCBInr. b The name of the proteins identified by LC-MS/MS and the functional categories of proteins according to the GO criteria, KEGG and NCBInr database. Protein names marked with an asterisk (*) have been edited by us depending on functional domain searching and similarity comparison according to the Gene Ontology criteria. c The plant species that the peptide…
