# Supplementary material for: Salinity-Induced Palmella Formation Mechanism in Halotolerant Algae Dunaliella salina Revealed by Quantitative Proteomics and Phosphoproteomics
Source: Front Plant Sci. 2017 May 23;8:810. doi: 10.3389/fpls.2017.00810 (PMC5441111; doi:10.3389/fpls.2017.00810)
Supplement: Supplementary file 9 [file Table9.XLSX]

## Sheet: Phosphoprotein
Supplemental Table S9. Homologs of D. salina phosphoproteins in Arabidopsis found by sequence BLASTing in TAIR database
Protein Name(a)	Plant Species(b)	Gi Number(c)	Sequence(d)	Accession number in Arabidopsis(e)	Unique accession number in Arabidopsis(f)	Protein name in Arabidopsis(g)	Score (bits)(h)	E-value(i)	Sequence identity (%)(j)
Cell structure (4)
Striated fiber-assemblin (SFA)	Dunaliella bioculata	1279362	MATSGMVSPTSGRPFSPMRSSVLTTTGSAIKLEHVSEKFAGLWTDLEQEKQARRIAEATRMQLFQESVLRLEKSMEAEVKRRAESDKQLQAHFEGELRVLHERSACQVAEMHNSLKSAIDSFSSRVQDLHAVIREERDQRRNDIEHLATSLVGKVNECVAALDEERTIRMQEQAMALKRFGEDISGVNHRVDTEKAQREADLSGLRVEIHDVLANRNIQDEQFKTVTLDELNAFKAALALEREERVAEDDEIVQAINDYTRALQEGLKMVNMQHNSA	AT4G32700	AT4G32700	Helicases; ATP-dependent helicases; nucleic acid binding; ATP binding; DNA-directed DNA polymerases; DNA binding	29.3	3.4	27
Flagellar associated protein (FAP)	Micromonas sp. RCC299	226524137	MTSPGRLGSPTSPGRLGSPTSPVGKTLGGSFVSEDGEPVMYSPGPGASGGVLKSTAFEEEQNRMLAARRKAQKQVEVMEQNALKKLERQAAAEEKVRRAKELERQRAHEKALEDQKKANETFIKLQQLKLNQEKLEKEKQRRAAEKHERELELKRLREAEERRARQEKKEKEELRRQRNAEFQARVDAMRAEKNRKIAHKARLMEEKEAARLAARRKEEQEIAAKNQAIHLFQAQKREQAIVRSEQTTEQFRTKTMKKTTAADMRWKDLTSKKAAKIQDMRSKLSERSQYVLSRNQAAKDIEQKRINALIERAEKEEERIKLIADRRKREAAMETLERSLSVEEKREKVECMKRYKEYQQAQLLEKIERDTARTVALQSAKEELRRQRREENMRVSLEI…
Tubulin alpha chain (TUA)	Chloromonas sp. ANT3	2625154	MREAISIHIGQAGCQIGNTCWELYCLEHGIQPDGQMPSDKTIGGGDAFNTFFSETGAGKHVPRAIFLDLEPTVIDEVRTGTYRQLFHPEQLISGKEDAANNFARGHYTIGKEIVDLALDRIRKLADNCTGLQGFLVFNAVGGGTGSGLGSLLLERLSVDYGKKSKLAFTVYPSPQVSTAVVEPYNSVLSTHSLLEHTDVAIMLDNEAIYDICRRSLDIERPTYTNLNRLIAQVISSLTASLRFDGALNVDITEFQTNLVPYPRIHFVLSSYAPIISAEKAYHEQLSVAEITNAVFEPASMMVKCDPRHGKYMACCLMYRGDVVPKDVNAAVATIKTKRTIQFVDWCPTGFKCGINYQPPTVVPGGDLAKVQRAVCMISNSTAIGEIFSRLDHKFDLMYA…	AT1G50010	AT1G50010	Tubulin alpha-2 chain	819	0	89
Kinesin-like calmodulin binding protein (KCBP)	Dunaliella salina	284518784	MSTQEDPYDQEGHGGQGSDDDTAPTARLDGLQGLQDQFQVEAFAKAAKSGKFASGASNLLAKIPSLRRTPGKSKPGEGAGGGLEDLLVFSNEPIPTSLLKMNSDHMGRATKMFAGMLKYMGEQGDPAEPAVGIEIAQKLHQGLKRPELKDELYMQLLKQTRGNPNVNSRTKAWELFQLTAATMPPSKDFVGLVSEYIHGVAHDDNEVPAVRNLASKTWSGLKRSAKAGPRRTLPSTEEIEAMFMGRRLNTIVFFLDETFEELSYDVTATVLEAVGQLAGMIKLQNYSTFTLFECRRPLSKAAQNSSSITNEPVTDEHLLLDDNKYIADVLCEFHNSKMAKEGWQSRLLFKKRMFRETDESITEPQFVNLSYVQAQHDYLMGNYPVVREDATQMCALQMQ…	AT5G65930	AT5G65930	Kinesin-like calmodulin-binding protein (ZWICHEL)	608	1e-174	53
Carbohydrate and energy metabolism (3)
Hypothetical protein VOLCADRAFT_65163, containing pfam01238 phosphomannose isomerase type I domain (PMI)*	Volvox carteri f. nagariensis	300259927	MLQLRCAAQNYDWGRKASESEVAKLAQANGSAIDESKPFAELWMGAHPNCPSKLQSTGESLQACLDKYPQLLGDKVVQNFGNQLPYLFKVLSVAKALSIQSHPDKALAERLHKEHPKAGLYADPNHKPEMALALSDFEALCGFASIAELQERLRRVPELALLVGQQHVDALLALPTTIAEEDDETASKAAKQTAFTALMTAPQEAVTAAVRGLVERLKAIAPGEELTPHEALALRLNEQFPDDVGLMSAFFLNLVRLPDGHAIYLPANEPHAYLAGELVECMAASDNVIRAGLTPKFKHADVLCESLTYRQGLPDVLTGSPAGTGITVYQPPFEEFEIHRIDCGSESAPGCKAMTLPASEGPRILLVQHGEAEATVSGQLPDALQAVSELESALALARG…	AT1G67070	AT1G67070	Mannose-6-phosphate isomerase, type I	334	9e-92	41
Glucose-6-phosphate isomerase (GPI)	Dunaliella salina	208463466	MLSNFKQGLRGTERLNQQGAFQGVPSAPAVPRGAQQPRTTQPSPRTTRVATRVARVPTEPRVDAEKDLTSPLHTFEASTLDMPTGRDVESISDTEEWKALQEHVKEINTTHLRDLLRDEGRCMNLIKESEGIYCDLSRQRITNKTSELLMKLANKANLKDKIEAMFSGEHINSTEDRAALHVATRARRDQSIVVDGRDVVPDVWEVLDKIKDFSNKVRSGEWKGVTGKPLKNVVAIGIGGSFLGPLFVHTALRTEPIAAMESEGRTLRFLANVDPIDVARALKDMNPEETLVVVVSKTFTTAETMLNARTVRKWLIAQLGPDAVAKHMVAVSTNLKLVKEFGIDPENAFGFWDWVGGRYSVCSAVGMLPLALEYGFDLMEEFLLGANSIDDHFRLMPLE…	AT4G24620	AT4G24620	Phosphoglucose isomerase 1	149	5e-36	29
Phosphoglucomutase 1 (PGM)	Dunaliella salina	290465235	MLHSGSRLTGASNRSANRSCIPSNAQHLRPVRGAQQQQQARQAPLVAMATAVKELPTQPIEGQKTGTSGLRKKTNVFMGPNYLANWVQSLFNALGAEIKGKTLCLGGDGRYFGKEASQIIIKLAAGNGFSKVVVGQNAIMATPAMSALIRRKKHYGGIIMSASHNPGGPEGDFGIKFNYTSGEPAPESITDKIYGETQKVSTLKMADMPDVDLNKIGSSKFGDFELEVIDPVEDYMAQLKEVFDFEALKKFVARKDFKMIFDAMHAVTGPYATRILVQELGAPASTVKDGVSSPDFNGGHPDPNLTYAKELVDIMWGANAPTFGAASDGDGDRNMILGNGFFVTPSDSVAMIAANASCIPYFKGGLKGVARSMPTSAALDRVAKGLNLPYFETPTGWKF…	AT5G51820	AT5G51820	Phosphoglucomutase	763	0	65
Photosynthesis (5)
Chloroplast minor chlorophyll a-b binding protein of photosystem II (LHCb)	Dunaliella salina	333691283	FLFEKLKSATASKAAAPAKAAPSKKAAAPKRAASRKVSNPPDLEKWYGPERKLFLPGGLLDRDDVPEYLNGELAGDYGYDPLGLGKDEEQVEKYRANELLHARWAMLAAAGILIPEGLQANGADIKGGTWFETGAEMLNGGTLNYFAVPFGVVQNPLPLAAVTLIEIVLLGAVEKFRVDGTGPAGFSPGVGKFDSDIFDGLDQLYPGGPFDPLNLADDPEVFAELQVKETKNGRLAMVGVLAFAIQSYVTGEGPYANFTKHISDPFGYNLLTVLQGDDRVPTL	AT4G10340	AT4G10340	Light harvesting complex of photosystem II 5	237	7e-63	54
Photosystem II protein H (PsbH)	Dunaliella salina	246880776	MATGKNSTQTSTSQEPGIVTPLGTLLRPLNSEAGKVLPGWGTTVLMAVAILLFAVFLLIILEIYNSSLILDGVTNSWESLSAK	ATCG00710	ATCG00710	Photosystem II reaction center protein H	54.7	1e-08	49
Sedoheptulose-1,7-bisphosphatase, chloroplastic (SBPase)	Chlamydomonas reinhardtii	1173346	MAAMMMRQKVAGAIAGERRSAVAPKMGRAATAPVVVASANASAFKGAAVTARVKASTRAARVQSRRTAVLTQAKIGDSLAEFLVEATPDPKLRHVMMSMAEATRTIAHKVRTASCAGTACVNSFGDEQLAVDMVADKLLFEALKYSHVCKLACSEEVPEPVDMGGEGFCVAFDPLDGSSSSDTNFAVGTIFGVWPGDKLTNITGREQVAAGMGIYGPRTVFCIALKDAPGCHEFLLMDDGKWMHVKETTHIGEGKMFAPGNLRATFDNPAYERLINFYLGEKYTLRYTGGIVPDLFQIIVKEKGVFTNLTSPTTKAKLRILFEVAPLALLIEKAGGASSCDGKAVSALDIPILVCDQRTQICYGSIGEVRRFEEYMYGTSPRFSEKVVA	AT3G55800	AT3G55800	Sedoheptulose-bisphosphatase	473	1e-133	70
Pyruvate phosphate dikinase (PPDK)	Chlamydomonas reinhardtii	158277740	MRGGSPASGEKGHRRRKPVGRLLRRRRPRQGRRQARPRTPVQHPPPHSSHIHQRVFIFGKNKSQGDATMKNLLGGKGANLAEMSRIGLSVPPGLTITTDTCAEFHTNGRQLPAGCWEEILAGLRSVEEEMGCRLGDAAAPLLLSVRSGAAVSMPGMMDTVLNLGLNDACAAGLAARSGDERFAYDAYRWRFLDMYGDVVMGIPHHLFEEQLERLKAEQRVSEDTALTAADLRTLVARYKEVYKQLGQVFPEDPYEQLRLAIYAVFDSWRSERADVYRAVNGITGLTGTAVNVQAMAFGNMGPTSGTGVCFTRNPSTGERKLYGEYLINAQGEDVVAGIRTPEPIETLERSLPGAFKELLDNCALLEKHYKDMQDIEFTVQEGKLYMLQCRGGKRTGTAA…	AT4G15530	AT4G15530	Pyruvate orthophosphate dikinase	1131	0	62
ATP synthase CF1 alpha subunit (CF1-ATPA)	Dunaliella salina	246880744	MAMRTPEELSNLIKDLIEEYTPEVKMVDFGIVFQVGDGIARIYGLERVMSGELLEFEDGTLGIALNLEANNVGGVLLGDGLKITEGSRVRCTGRIAEIPVGEAYLGRVVNSLAQPVDGKGPINTTDSRAIEAAAPGIVSRRSVYEPLQTGLVSVDSMIPVGRGQRELIIGDRQTGKTAIGVDTILNQKGKGVICVYVAIGQKASSVAQVLTTLKERGALDYTIIVMSTANEPATLQYLAPYTGATLAEYFMYTGRPTLCVYDDLSKQAAAYREMSLLLRRPPGREAYPGDVFYLHSRLLERAAKLNTALGEGSMTALPIVETQEGDVSAYIPTNVISITDGQIFLSSGLFNSGLRPAINVGISVSRVGSSAQFKAMKQVAGSLKLALAQFGELEAFSQF…	ATCG00120	ATCG00120	ATP synthase subunit alpha	734	0	71
Other metabolisms (4)
Hypothetical protein CHLNCDRAFT_48950, containing cd00831 Chalcone and stilbene synthases (CHS)*	Chlorella variabilis	307106155	MVRCFSTIRFVVACLADYRHGAPVALKYVKRGYHVLCSHGLTLALMPLAATGVVTFVLSCLLLVFVAATY VFTRSRPVYLLNFYCLKPPANLKINNEFFMQHSRNSKAFTQDSLDFQEKVLSRSGLGEETYLPGGIMSQP PRINMQAAREEAQLVLFNTVAEVLKATGTKPQAVDILVVNCSLFNPTPSLSAMIVNHFKMRSNVMTYNLS GMGCSAGVISIGLAQQLLQVFPNSTALVVSTENLTKNWYFGNDKSMLVPNCLFRLGGAAMVLSNKRTDRW RAKYELLHVVRTHMGQDDAHYGCVYQKEDSDGKEGVFLSKELMRIAGHALKANITTLGPLVLPISEQLLFFGNLVARKMLRLKVRSYIPDFKLAFEHFCIHTGGRGVIDAIEKQL…	AT2G26640	AT2G26640	3-Ketoacyl-CoA synthase 11	558	1e-159	55
Unnamed protein product, containing pfam00120 glutamine synthetase domain(GS)*	Helicosporidium	227477517	MSPPTGEKYSLPPVFGTQGQITQLLDPIMAERFKDLSQHGKVMAEYVWIGGTGSDLRCKTRVLDSVPNSVEDLPVWNYDGSSTGQAPGDDSEVFLIPRAIYRDPFRGGDNILVLADTYEPPRVLPNGKVSPPVPLPTNSRHACAEAMDKAAAHEPWFGIEQEYTVLDARTKWPLGWPSNGFPGPQGPYYCAAGAGCAIGRDLIEAHLKACLFAGINVSGVNAEVMPSQWEYQVGPCTGIESGDQMWMSRYILIRCAELYNVEVSFDPKPVPGDWNGAGGHVNYSNKATRTAETGWAAIQQQVEKLGKRHAVHIAAYGEGNERRLTGKHETSSMNDFSWGVANRGASVRVGRLVPVEKCGYYEDRRPASNLDPYVVTRLLVETTLLM	AT5G37600	AT5G37600	Glutamine synthase clone R1	397	1e-110	56
Glutamine synthetase II (GSII)	Prototheca zopfii	283139174	MSPSGEKYTLAPVFGTDGQITQLLDPQIWSRFEDLDQSGKVCAEYVWIGGTGADLRSKTKVVPKVPSSADELPHWNYDGSSTGQAPGEDSEVYLIPRAIYRDPFRGGDNILVMADAYEPPRVNADGTVSDPVPLPTNTRYAAAEAMTKAAAQEPWFGIEQEYTVLDARTKWPLGWPSNGYPGPQGPYYCSAGAGNAIGRDLIEAHLRACLYAGINVSGVNSEVMPSQWEYQVGPCTGIDSGDQLWMSRYILVRLAELYNVTVTLDPKPIPGDWNGAGGHVNYSNNDTRAEGTGWAAIQKQVEKLGRRHAVHIAAYGEGNERRLTGKHETSSMDDFSWGVANRGCSIRVGRMVPVEKSGYYEDRRPASNLDPYVVTRLLVESTLLQ	AT5G35630	AT5G35630	Glutamine synthetase 2	445	1e-125	59
Hypothetical protein CHLNCDRAFT_57286, containing cd04301 N-Acyltransferase superfamily (NAT)*	Chlorella variabilis	307109275	MTVSACLTTSSATHCCQPCAIRRGSASRGARSPPRPASQRARRGLACRGFLSGLFGSGGGSGGATVAEPGVAEDYSLENLDEVLLTELQAEDGSQRYIVYRNGGLVDAAELEALCDKVGWPRRPQNKVQAALANSFLVATLTLEDAPPRSSSSDCSDGSSSGSGSGSPPTSSRPASSSSGTPGRLIGLARCTSDGAFNATLWDVLVDPEFQGQGLGKALVEGVTRTLLKRDITNITLFADSAGKP	AT2G26640		3-Ketoacyl-CoA synthase 11	301	7e-82	48
Transcription (4)
Hypothetical protein VOLCADRAFT_82285, containing smart00658 RNA polymerase subunit 8 domain (RPB8)*	Volvox carteri f. nagariensis	300261198	MARSQPILFEDVFDVVDKDPDGKKFDSVSRFICHSDLYEMDLHIDLNVELFPLQRNDKFSLVLAWTLNLDATPGSEKYDAFPAISGRRTLMDNYDYVMYGKVFKYKDNNMKVEVYISFGGLLMKLAGDPAKLEPIEVDSNVYLLLKKL	AT1G54250	AT1G54250	RNA polymerase Rpb8	134	3e-32	47
Hypothetical protein VOLCADRAFT_120953, containing cd00268 DEAD-box helicases (DBH)*	Volvox carteri f. nagariensis	300263278	MAAPPVEQRTGFDDRAFDSKMQAFLTNNQDNFYTDWEESFESFDQMNLHENLLRGIYAYGFEKPSAIQAKGIVPFTKGLDVIQQAQSGTGKTATFCAGILNNLDYNLNECQALVLAPTRELAQQIEKVMRALGDFLQVKCHACVGGTSVREDARILGAGVQVVVGTPGRVFDMLRRRYLRADNIKMFVLDEADEMLSRGFKDQIYDIFQLLPPKLQVGVFSATLPPEALEITRKFMNKPVRILVKRDELTLEGIKQFYVDVDKEEWKLDTLCDLYETLAITQSVIFANTRRKVDWLTEKMRERDHTVSATHGDMEQNARDVIMREFRSGSSRVLITTDLLARGIDVQQVSLVINYDLPTQPENYLHRIGRSGRFGRKGVAINFIVKEDERMLQDIQRFY…	AT3G13920	AT3G13920	Eukaryotic translation initiation factor 4A1	711	0	84
Hypothetical protein CHLNCDRAFT_34097, containing pfam06424 PRP1 splicing factor, N-terminal (PRP1)*	Chlorella variabilis	307110542	MSRQGVRPQPLPPGLKVDFNALRAPSGYVAGMGRGAAGFTTRSDIGPSMPAPDVKKDKAGTRAGGLVADADAGADDTKFDAFLGNDAGVLGATGVYDEEDREADNVWDNVEDRMDERRKERRETKLKEELEQFRAENPKIQEQFADLKRKLADVPMEQWEAIPDIGDYTVKKQKHLDRFTPVPDSLLAGAAARDATATAIDAHGPGGLETPMGGGITTDLTAMGAGRNTVVQLKLDKISDSVSGQTVVDPKGYLTDLKSVTLKSDAEISDIKKARLLLKSVINTNPRHAPGWIAAARLEEVAGKLQQASGLPWHACSRTAGCCELCPSNEDVWLEAARLQTAENAKAILARGVAALPDSVKLWMQAARLEQSDDAKKRVLLRALERIPQSVRLWKAVVE…	AT4G03430	AT4G03430	Pre-mRNA splicing factor-related	970	0	53
Set domain protein (SET)	Micromonas pusilla CCMP1545	226455398	MASARTPTHEASFDDRGAYVVRVRLPGVSSSSAVSVDVVNGDVLEVFALAYGGDDDDDDASSASSAAGGWRLTHPLPFAVSSSSSSSARAEVSRVKFSKKSRTLTVAFDGASAMDPSPTPTKAAAERATAPFPPDEPSREYEPSPPPSPISRASDDDDDRREEEEDASEPSSSSPGRSPPPPPPPRRPPPRDAAPSQTLPGGIDFAFDPNLYLCVDATGARGRHLRARRALREGDVVMTCDPLVCAVHDRHAERACAFCYRDVDGGGVRCDACDAALYCGRRCRAADTSHVGECALARRAKTDPRLSSATRGLRLFLRLLYVRATAPGLFDAVKALDSPFRDVSAEKRATYVGMANAVNSMLPPGPARMDVDALAEVMSKVHVNSHGVVDAAGRALGTG…	AT2G17900	AT2G17900	SET domain group 37	103	3e-22	23
Protein synthesis (4)
Ribosomal protein S3a (RPS3a)	Chlamydomonas reinhardtii	158283213	MAVGKNKRISKGKKGGKKKASDPFAKKDWYDIKAPTMFTVRNVGKTLVTRTQGTKIASEALKGRVFEVSLADLQKNEDDAFRKMRLRVEDVQGRNCLTNFWGMDFTTDKLRSLVRKWQTLIEAHVDVKTTDGYTLRVFCISFTKKRQGQIKRTCYAQSAQIRQIRKKMMEIITREATSCDLKELVAKFIPESIGKDIEKSCQGIYPLQNTFIRKVKVLKAPKFDITKLMEVHGDYSEEVGAKIERPAAAAPAVEEAATA	AT4G34670	AT4G34670	Ribosomal protein S3Ae	389	1e-109	79
Ribosomal protein S6 (RPS6)	Chlamydomonas reinhardtii	158276036	MKLNIAYPATGCQKKLEVDDEAKLRAFYDRRVAAEVDGEVLGEEFKGYVLKIAGGQDKQGFAMKQGVLTNARVRLLMTPGDQGFRGYGRRKGERRRKSVRGCIVSPDLAVLNLVIVKKGEQELPGLTDEEKPRIRGPKRASKIRKMFNLGKVDDVRKYVTIYSRERTDKNGKKHRKCPKIQRLVTPAALQRKRARKSLKKRQQEKNKTDAAEYHKLLMQRLKEQRERRSESLAKKRAMRVASQASKEA	AT5G10360	AT5G10360	Ribosomal protein S6e	304	3e-83	64
Ribosomal protein S9 (RPS9)	Dunaliella salina	246880774	MGEIGKKSFMNILARSVGRRKEAVAQVQIVKGTNEAPGGQFIINNIPAENYLHNNTCSILSVKAPISILQSLHDASVEGENTDFKNDLGNFNTVVKVKGGGLVGQAEAIKLGLTRAICQLYAITPNNQNKSIREFPIENSMEESSKISSSGMSYETTIELRKQFKDKGFLTQDSRVKERRKYGLKKARKASQYHKR	AT1G74970	AT1G74970	Ribosomal protein S9	62.4	2e-10	29
Ribosomal protein L12 (RPL12)	Chlamydomonas reinhardtii	158274884	MPPKFDPSDVVEVCVRVTGGEVGAASSLAPKIGPLGLSPKKIGEDIAKETLKDWKGLRITVKLTVQNRQAKISVIPSAAALVIKALKEPARDRKKEKNIKHTGSVTMSDIIEIARVMRPRSCAKDLANGCKEILGTAVSVGCKVDGKDPRDVISAIDDGAIEIPDA	AT2G37190	AT2G37190	Ribosomal protein L11 family protein	257	3e-69	75
Protein folding and transporting (1)
Hypothetical protein VOLCADRAFT_120515,containing cd00632 Prefoldin beta domain (PFDb)*	Volvox carteri f. nagariensis	300266633	MSTDPETVRKALQKEAEAYRGHQGELSKLATTKRDLTARHQETETVLEELKLLDEDANVFKAVGPVLVKQDLLEARTNVTNRLEFIKKDIERLDNQIKSVESKMLDREKEVIYHLNNKNEDNELDLVELAEQYETEIEQILKDTADKINHFKAQLDAANDAARIAELTKQIEAKYDDERRRCITEIESIRKRAAEKEAAIQKAATKQIEGLQTQVDELQRQLQARIKEVNNMSLNANASNQELQAALARARQETEDAIQTHNKKYNDMLAERMRKEDDLSEQLEGLRRQLDAANRSREQLEAASGEARTRWDQERAAMTEERKASDASWKGKVEALVEEVQREKAAGKEAAKRAADAAAAADAAATQRIKQLEGSLGGVEAQLQGKAEEAARQVQWHWL…	AT1G29990	AT1G29990	Prefoldin 6	55.5	3e-07	53
Protein degradation (3)
Hypothetical protein CHLNCDRAFT_133427,containing cd00118 Lysin domain (LysM)*	Chlorella variabilis	307111867	MGLFGGKKHTVVAGDTLQSIAAQYGTTPEALLKRNRKQVQSAEQIQPGMAFRRLCTRCPAAAEPPCVQQLGGEQGSVASPQQYLQALQELLVQYDVTLPAATLFRPVLLKAVAGLVEAAIGSRRGGTGRGGAVQPGPELAVALLSVLELAPHTEGLVLRYFHHAPPPFHYLLPPAADGAASCAVPVGQLARSTLRGLQLLPQLQWPVAAALPALLQHADADVRWCAAECAALAFGLQDASRAKLAGRVLSEEEEAQCRLRWQNERAMYCAELAVMYCSSTSSSHGLAAGSSGQQAEAMDAAPTPPAARRGAGAARSGDSSGSRKRKHGGGGEDSDADTAALGGAAGGMAPAAGYVEVCGLELPQRQQHGGGGGAALAPLVHTPAVDHNLEALALGLCLG…	AT1G67120	AT1G67120	ATPases; nucleotide binding; ATP binding; nucleoside-triphosphatases; transcription factor binding	1025	0	42
Hypothetical protein VOLCADRAFT_109434, containing cd00195 UBCc, Ubiquitin-conjugating enzyme E2 catalytic domain (UBC) *	Volvox carteri f. nagariensis	300256553	MLKLFSVKDKQKQQQEANAGAGKPGKLSAGELRIQKDMAELNLPPNITISFPDGKDKLMHFFIAIRPDEGIYRGGKFNFEFNIPTGYPHDAPKVLCTTKVYHPNIDLEGKICLNILREDWKPVLSISSVIYGLQFLFLDPNPDDPLNKEAAQMFVDNPRQFEQYVQRAIHYGTYINNVHFPSCTA	AT2G18600	AT2G18600	Ubiquitin-conjugating enzyme family protein	218	1e-57	56
Membrane AAA-metalloprotease (FtsH)	Chlamydomonas reinhardtii	158279575	MSAFTARPEALASKAGRRTFARNTEALRSQLLGLPKRSSRVTAKYSPKQLSENLASELVAKLPKAALASLLSLSTAGVATAADYFAPPTDANTTTTTATTQAPASMNFASSAPLAAPEVRSEYTLPEGNQWRYSEFVNAVEAGKVERVRFSKDGSQLQLTAVDGRRATVVLPNDPDLVDILAKNGVDISVSEGDQQGNYVALLGNILFPLIAFGGLFFLFRRSQNGGGGAGPMGGMGGAMDFGRSKSKFQEVPETGVVFDDVAGCDGAKLELQEVVDFLKNPDKYTALGAKIPKGCLLVGPPGTGKTLLAKAVAGEAGTPFFSCAASEFVEVFVGVGASRVRDLFEKAKSKAPCIIFIDEIDAVGRQRGAGMGGGNDEREQTINQLLTEMDGFEGNTGV…	AT5G42270	AT5G42270	FtsH extracellular protease family	904	0	74
Signaling (4)
Hypothetical protein VOLCADRAFT_84366, containing cd07419 Arabidopsis thaliana Bsu1 phosphatase and related proteins, C-terminal metallophosphatase domain (BSU)*	Volvox carteri f. nagariensis	300256509	MDSDLRPSPVPRPRVFPVVGTAPGPRCGHTLTAISGPEGDLSKAKLVLFGGATALEGSSGKSEGAQSTPGSAASGRALFAGIRLAGATNDVHIFDVRTGKWEKTTPAGEPPSPRAAHAAAAVGNMVVIQGGIGPAGLASEDLHVLDFTDPDRPRWHRVLVSGPGPSARYAHTLSLVANRFLVAMGGNDGKSTLGDAWALDTSEKPYAWRKITDAGEMPSPRMYATAAARSDGLLLLCGGRDVGGTPLGDAYGFARHRDGRWEWHSAPGAMPTGRYQHGAVFVGNRLHISGGAVGGGRMVDEGTSTVVLDTTHGCWVTPTSVASGEDFTRRCRHAVASVGPFVFIYGGLKARWYGSQLLDDLLVADDSNGTELSIFDPRSSAWQQYMESMHGNAAASRML…	AT2G27210	AT2G27210	BRI1 suppressor 1 (BSU1)-like 3	586	1e-167	68
Snf1-like protein kinase (SNRK)	Chlamydomonas reinhardtii	158271168	MAAANQKPGPAGRPEPLIGHPRYEKIKDLNSGTFGFVQLARDKLTGETWAVKFIERGDKITKYVEREIINHRCLVHPHIVQFREVFLTPTHLCIVMEFAPGGDMFEYVVRKNGLREDEARWFFQQLIVGLDYCHRMGVVNRDIKLENTLLDSSPRPLVKICDFGYSKHEKFQSAPGSRVGTPAYLAPEVILTTKGKTYDGKIADIWSCGVMLYVMLVGAYPFERPEDKHDNQKLQKMIQRILHVDYHIPPHVRASEDCKDLLAKILVADPHKRITVDGIYNHKWYLKGLPPGVREMNDRVQPPPEGLQSVEEIKRLIEEARHVGVGAPGYVNPVETDEYIDDAMDNMYDEGSLDYND	AT4G40010	AT4G40010	SNF1-related protein kinas 2.7	335	3e-92	56
Hypothetical protein CHLNCDRAFT_136605, containing cd14137 glycogen synthase kinase 3 domain (GSK3)*	Chlorella variabilis	307105164	MDALKKITGKRSSSDAATEAATGSRREVSSASNQRATAEVQQQFKELTLSPAQREGKEPVFEGRVTEGDPNNVGHVITTAGGSGASKQVIRYLTERVVGNGSFGVVFQAKCIETSETVAIKKVLQDKRFKNRELQIIRMMSHPNIVQLKHCFYTTTEKDEVYLNLVLEYVPDTVYRINKHYTKNEQRMPIILVKLYTYQMLRALAHIHSIGVCHRDIKPQNLLVNINTHALKLCDFGSAKTLVRGEPNISYICSRYYRAPELIFGATDYTCAIDVWSVGCVMAELLLGSPLFPGESGVDQLVEIIKVLGTPTREEIHAMNPNYTEFKFPQIKAHPWAKVFSKRMPADAVELVSKLLVYSPAQRSTALDALRHAFFDELRDPACRLPNGRPLPPLFNWID…	AT5G26751	AT5G26751	Shaggy-related kinase 11	549	1e-156	68
Hypothetical protein VOLCADRAFT_116796, containing cd00173 Src homology 2 domain (SH2)*	Volvox carteri f. nagariensis	300266429	MGTGLGPAWFSQEFPGLAARREPFPDVDRWQTTYVRYSSSETAQARGWNAECCRRNLHSLGVNDHPILRQHNLPDAINMRIIEAPAEFALPVKQDRRLLPCFKVRLEVQHHGALWLPVTLRAHVLSQQDKEQITSWLPPDDINGRDDKVQAAANGETRAVGIGGKDGQSLPQSANGGSTALVYSSSLRSTDRLSVKLEPSSFSFSGDAAGGGAGGGGAGGVSSSFNPDGLGGNSSAGVRTLSGLQPDQHNVLEPYGLMESAGLTVNGMIRDMGPAGRQHGLTSGGSAAAAGRDPIGPLNSLFAANRPDPVVTLASSGRMSSTGNGLAMAGNGARLGTGEPRDSFDVTVEMLMQQQQPLQYPLQRRSSPIHGGGALEAPAAPAGGIGGQLIHEMQRQLQQ…
Function unknown (3)
Predicted protein, no putative conserved domains have been detected*	Micromonas pusilla CCMP1545	226455999	MALPPRLRRGVVCAALLAIVLACNHFCRDAPGTIEEQLRADPSLDVTPTRFSIMTALYFAPSALVPLVAGGVSSLPKHHAAYVSPQRAFATVAAVGAAGNVLSAAGASSGSFAALACGRAVAGSVYEAIDMTPLGFVPALLPGLWGTASGFITGALRLGSVLAFAALPRIYEQSGGGADGGGGVAAVFWFAACVGVVMWPLAAIVREVATRAAFDASPHWGGGSLGARLRAWLSDGGDGGDDDDDGGGGAASGGGGGEALKAFESSTGGGGGEAPTPPIASSIATAVAAVVSAVETVPRSFWLYALSGTCMYRRRRRGRDVAAADELMLLPELALAVLSVPIGVAVDRAKLSFRAQQLGFSVCALMITLAHAALLFGGDEVAAVFFLGVGYACCNQVRS…						1.5688
Predicted protein, no putative conserved domains have been detected*	Micromonas pusilla CCMP1545	226457710	MEEAEAAAAAGGGAAMRSVPLPERFDSTNGGWGLGGTGIRPAAKAPSKSRRAMSMTSSSLNNPYAPSDGGAVRGGGEFSNQSNYFAGTLRSGDVRSSSGAMIPGRRGTTSSQKSLASSTVGAKAPAAASNSNSKGIFRAVEEVKVTKGVGSADPAFLKRVNSMSLTSSPRSGASVRAINPATRERK
Hypothetical protein VOLCADRAFT_86882, no putative conserved domains have been detected*	Volvox carteri f. nagariensis	300267726	MFARQCKPPVARLLLFLLACLKLQAIIAAHISWDWGASNRRLQPSPTAFVYDSQSCLCTKFSKVGNFTNDFLKLCSYLDQCGGSQYRILNSYLVSEDCDPESQIDCETLPAGYRSCDAWISDLSGSNASTACPEFSCCELAPSQPNVTTCRDNSLYCFNKGPQLPNDPSYIRYCNTSQRPRNETQVCSWKWSTKDGSPSPSPSSPSLPPSSPPPPSSASPPSFPPPKPNPLAPSALNPELPSPPQTSILVVPDETAAISASPPSPKPPRPRSPLPPSPKPPPYSPPTPPSPGPKPPKPPPPPSIRPKPTNPSGLTDKQITVVILASVGGSVAVGLVITAVIAYRNCCKKANLRPLLHPGPSSKYRYTEEDEYPEDYQQEEAEEEYSHAASKRRTGRTQT…
a The name of the proteins identified by LC-MS/MS and the functional categories of proteins according to the GO criteria, KEGG and NCBInr database. Protein names marked with an asterisk (*) have been edited by us depending on functional domain searching and similarity comparison according to the Gene Ontology criteria. The abbreviations for the protein names are indicated in the bracket after pro…
